# Supplementary material for: Blood leukocyte microarrays to diagnose systemic onset juvenile idiopathic arthritis and follow the response to IL-1 blockade
Source: PubMed Central journal article supplement — J Exp Med. 2007 Sep 3;204(9):2131–44. doi: 10.1084/jem.20070070 (PMC2118700; doi:10.1084/jem.20070070), 2007-09-03
Supplement: jexpmed_jem.20070070_4.pdf [file jexpmed_jem.20070070_4.pdf]

**Table S1. Patient clinical data**  
**SoJIA patients with systemic symptoms**

| Demographics |        |     |           |     | Clinical symptoms |           |            |                                       | Medication  |             |              |                    |          | Meta-analysis | Healthy vs SOJIA prediction |
|--------------|--------|-----|-----------|-----|-------------------|-----------|------------|---------------------------------------|-------------|-------------|--------------|--------------------|----------|---------------|-----------------------------|
| Patient      | Date   | Age | Ethnicity | Sex | Fever             | Arthritis | Disease dx | Duration of systemic symptoms (fever) | Steroids PO | Steroids IV | Methotrexate | Infliximab /enbrel | Anakinra |               |                             |
| sys02        | May-02 | 11  | W         | F   | yes               | Yes       | Jan-95     | 3 months                              | yes         | no          | yes          | yes                | no       | Training      | Training                    |
| sys12        | Jun-02 | 4   | W         | F   | yes               | Yes       | Mar-01     | 1 week                                | yes         | no          | yes          | no                 | no       | Test          | Test                        |
| sys12        | Feb-04 | 6   | W         | F   | yes               | Yes       | Mar-01     | <7 days                               | yes         | no          | yes          | no                 | no       | Training      | Training                    |
| sys15        | Jul-02 | 2   | H         | F   | yes               | Yes       | Aug-01     | 15 days                               | yes         | yes         | yes          | yes                | no       | Training      | Test                        |
| sys16        | Jul-02 | 4   | H         | F   | yes               | Yes       | Jul-02     | 2 months                              | no          | no          | no           | no                 | no       | Training      | Training                    |
| sys17        | May-05 | 10  | W         | M   | yes               | Yes       | Sep-99     | 4 months                              | no          | no          | yes          | yes                | no       | Test          | -                           |
| sys21        | Nov-02 | 4   | A         | F   | yes               | Yes       | Dec-00     | <7 days                               | yes         | no          | yes          | no                 | no       | Training      | Test                        |
| sys21        | Apr-04 | 6   | A         | F   | yes               | Yes       | Dec-00     | 4 months                              | yes         | yes         | yes          | no                 | no       | Test          | -                           |
| sys25        | Nov-02 | 13  | W         | F   | yes               | Yes       | Sep-92     | 3 months                              | no          | no          | yes          | no                 | no       | Test          | -                           |
| sys25        | May-03 | 14  | W         | F   | yes               | Yes       | Sep-02     | 1 month                               | yes         | yes         | yes          | no                 | no       | Test          | -                           |
| sys32        | Nov-02 | 9   | W         | F   | yes               | Yes       | Jul-00     | 9 months                              | yes         | no          | no           | no                 | no       | Training      | Test                        |
| sys33        | Sep-02 | 17  | H         | F   | yes               | Yes       | Jul-00     | 1 month                               | yes         | yes         | yes          | no                 | no       | Training      | Training                    |
| sys39        | Nov-02 | 5   | H         | F   | yes               | No        | Mar-00     | 1 year 8 months                       | yes         | yes         | no           | no                 | no       | Training      | Training                    |
| sys51        | Feb-03 | 2   | W         | F   | yes               | Yes       | Sep-02     | <7 days                               | yes         | yes         | no           | no                 | no       | Training      | Test                        |
| sys51        | Jan-04 | 3   | W         | F   | yes               | Yes       | Sep-02     | 3 weeks                               | yes         | no          | yes          | no                 | no       | Test          | -                           |
| sys52        | May-03 | 14  | W         | F   | yes               | Yes       | Apr-03     | 2 months                              | no          | no          | no           | no                 | no       | Training      | Test                        |
| sys53        | May-03 | 9   | W         | F   | yes               | Yes       | Mar-03     | 3 months                              | no          | no          | no           | no                 | no       | Training      | Test                        |
| sys56        | Feb-04 | 4   | H         | F   | yes               | Yes       | Feb-04     | <7 days                               | yes         | yes         | yes          | no                 | no       | Training      | Test                        |
| sys62        | Mar-04 | 9   | H         | F   | yes               | No        | Jun-98     | <7 days                               | yes         | yes         | no           | no                 | no       | Training      | Test                        |
| sys68        | Jan-04 | 6   | H         | F   | yes               | Yes       | Dec-03     | 1 month                               | no          | no          | no           | no                 | no       | Training      | Training                    |
| sys78        | Oct-04 | 3   | W         | M   | yes               | No        | Sep-04     | 1 month                               | no          | no          | no           | no                 | no       | Training      | Training                    |
| sys81        | Oct-02 | 6   | AA        | M   | yes               | Yes       | Oct-02     | 10 days                               | no          | no          | no           | no                 | no       | Training      | Training                    |
| sys99        | Jul-06 | 5   | W         | M   | yes               | Yes       | Jul-06     | 1 month                               | no          | no          | no           | no                 | no       | Test          | -                           |

### Rule out SoJIA patients (diagnosis not confirmed upon follow-up)

| Demographics |        |     |           |     | Clinical symptoms |           |            |                                       | Medication  |             |              |                    |          | Meta-analysis | Healthy vs SOJIA prediction |
|--------------|--------|-----|-----------|-----|-------------------|-----------|------------|---------------------------------------|-------------|-------------|--------------|--------------------|----------|---------------|-----------------------------|
| Patient      | Date   | Age | Ethnicity | Sex | Fever             | Arthritis | Disease dx | Duration of systemic symptoms (fever) | Steroids PO | Steroids IV | Methotrexate | Infliximab /enbrel | Anakinra |               |                             |
| Sys85        | Apr-05 | 8   | AA        | F   | yes               | no        | Apr-05     | 3 weeks                               | no          | no          | no           | no                 | no       | Training      | Training                    |
| Sys91        | Jan-06 | 4   | W         | F   | yes               | no        | Jan-06     | 2 weeks                               | no          | no          | no           | no                 | no       | Test          | Test                        |

### SoJIA patients with no systemic symptoms but active arthritis at the time of blood sample extraction

| Demographics |        |     | Clinical symptoms |      |       |           |            | Medication  |             |              |                    |          |
|--------------|--------|-----|-------------------|------|-------|-----------|------------|-------------|-------------|--------------|--------------------|----------|
| Patient      | Date   | Age | Patient           | Date | Fever | Arthritis | Disease dx | Steroids PO | Steroids IV | Methotrexate | Infliximab /enbrel | Anakinra |
| sys01        | Aug-02 | 17  | W                 | F    | no    | yes       | Jan-87     | no          | no          | no           | no                 | no       |
| sys06        | May-02 | 5   | As                | F    | no    | yes       | Nov-00     | yes         | yes         | yes          | yes                | no       |
| sys13        | Sep-04 | 4   | AA                | F    | no    | yes       | Jun-01     | yes         | yes         | yes          | no                 | no       |
| sys19        | May-02 | 3   | W                 | F    | no    | yes       | Oct-00     | yes         | yes         | yes          | yes                | no       |
| sys20        | Jul-02 | 9   | W                 | F    | no    | yes       | Jan-02     | yes         | yes         | yes          | yes                | no       |
| sys24        | Jul-02 | 5   | W                 | M    | no    | yes       | Oct-00     | yes         | yes         | no           | yes                | no       |
| sys27        | Nov-02 | 8   | AA                | M    | no    | yes       | Apr-99     | yes         | yes         | yes          | no                 | no       |
| sys28        | Aug-02 | 2   | W                 | F    | no    | yes       | Nov-01     | yes         | yes         | yes          | no                 | no       |
| sys40        | Jun-02 | 13  | W                 | M    | no    | yes       | Nov-91     | no          | no          | no           | yes                | no       |
| sys70        | May-02 | 4   | AS                | M    | no    | yes       | Sep-01     | no          | no          | no           | no                 | no       |
| sys74        | Nov-04 | 10  | H                 | M    | no    | yes       | Sep-98     | no          | no          | yes          | no                 | no       |

## Clinically inactive SoJIA patients

| Demographics |        |     |           |     | Clinical symptoms |           |            | Medication  |             |              |                   |          |
|--------------|--------|-----|-----------|-----|-------------------|-----------|------------|-------------|-------------|--------------|-------------------|----------|
| Patient      | Date   | Age | Ethnicity | Sex | Fever             | Arthritis | Disease dx | Steroids PO | Steroids IV | Methotrexate | Infliximab/enbrel | Anakinra |
| sys13        | Jun-02 | 2   | AA        | F   | no                | no        | Jun-01     | yes         | no          | no           | no                | no       |
| sys14        | Jun-02 | 13  | W         | M   | no                | no        | May-97     | yes         | yes         | yes          | no                | no       |
| sys22        | May-02 | 5   | W         | F   | no                | no        | Feb-02     | yes         | yes         | no           | no                | no       |
| sys23        | Jul-02 | 7   | W         | M   | no                | no        | Mar-98     | no          | no          | yes          | no                | no       |
| sys29        | Aug-02 | 15  | AA        | F   | no                | no        | Mar-00     | yes         | no          | yes          | no                | no       |
| sys31        | Sep-02 | 5   | W         | F   | no                | no        | Mar-02     | yes         | yes         | no           | no                | no       |
| sys35        | Sep-02 | 12  | W         | F   | no                | no        | Jun-96     | yes         | no          | yes          | no                | no       |
| sys37        | Nov-02 | 8   | W         | M   | no                | no        | May-02     | yes         | no          | no           | no                | no       |
| sys42        | Nov-02 | 11  | W         | M   | no                | no        | May-96     | no          | no          | no           | no                | no       |
| sys44        | Nov-02 | 13  | AA        | F   | no                | no        | Nov-98     | no          | no          | no           | no                | no       |
| sys47        | Mar-04 | 10  | H         | M   | no                | no        | May-01     | no          | no          | no           | no                | no       |
| sys49        | Jun-02 | 11  | W         | F   | no                | no        | Mar-95     | yes         | no          | yes          | no                | no       |
| sys68        | Nov-04 | 6   | H         | F   | no                | no        | Dec-03     | yes         | no          | no           | no                | no       |
| sys69        | Feb-04 | 16  | AA        | M   | no                | no        | Aug-02     | yes         | no          | no           | no                | no       |

## SoJIA patients on Anakinra

| Demographics |        |     |           |     | Clinical symptoms |           |            | Medication  |             |              |                   |           |                |
|--------------|--------|-----|-----------|-----|-------------------|-----------|------------|-------------|-------------|--------------|-------------------|-----------|----------------|
| Patient      | Date   | Age | Ethnicity | Sex | Fever             | Arthritis | Disease dx | Steroids PO | Steroids IV | Methotrexate | Infliximab/enbrel | Anakinra  | Anakinra since |
| sys02        | Sep-04 | 13  | W         | F   | yes               | yes       | Jan-95     | yes         | no          | yes          | no                | 3 mg/k    | 6 months       |
| sys12        | Jul-04 | 6   | W         | F   | no                | yes       | Mar-01     | yes         | no          | no           | no                | 2 mg/kg   | 5 months       |
| sys15        | Apr-05 | 4   | H         | F   | no                | no        | Aug-01     | yes         | no          | no           | no                | 4 mg/kg   | 2 years 1m     |
| sys17        | Aug-05 | 10  | W         | M   | no                | yes       | Sep-99     | no          | no          | no           | no                | 2.5 mg/kg | 2 months       |
| sys21        | Nov-04 | 6   | A         | F   | no                | no        | Dec-00     | yes         | no          | yes          | no                | 4 mg/kg   | 6 months       |
| sys25        | Sep-04 | 15  | W         | F   | no                | yes       | Sep-02     | yes         | no          | yes          | no                | 2 mg/kg   | 5 months       |
| sys33        | Sep-05 | 19  | H         | F   | no                | no        | Sep-00     | no          | no          | no           | no                | 2 mg/kg   | 2 years        |
| sys78        | Dec-04 | 5   | W         | M   | no                | no        | Sep-04     | no          | no          | no           | no                | 2 mg/kg   | 2 months       |

## PAPA syndrome patients:

| Demographics |     |           |     | Clinical symptoms |                  | Medication                          |
|--------------|-----|-----------|-----|-------------------|------------------|-------------------------------------|
| Sample       | Age | Ethnicity | Sex | Arthritis         | Skin Involvement |                                     |
| FRA1-1       | 13  | White     | M   | No                | Yes              | Remicade, Steroids IV, Methotrexate |
| FRA1-4       | 44  | White     | M   | Yes               | No               | Celebrex                            |
| FRA1-8       | 20  | White     | M   | No                | No               | Enbrel, Celebrex                    |
| FRA1-10      | 11  | White     | F   | No                | No               | Methotrexate, Steroids PO           |
| FRA1-13      | 68  | White     | F   | No                | No               | None                                |
| PPA1-4       | 40  | White     | M   | No                | Yes              | Steroids PO                         |

## S. aureus patients

| Sample | Age | Ethnicity | Sex | Clinical disease                     | Medication                         | Meta-analysis |
|--------|-----|-----------|-----|--------------------------------------|------------------------------------|---------------|
| INF005 | 10  | Hispanic  | M   | Osteomyelitis                        | Cefazolin                          | Training      |
| INF024 | 3   | Black     | M   | Osteomyelitis                        | Vancomycin, Rifampin               | Training      |
| INF030 | 15  | Black     | M   | Bacteremia                           | Vancomycin                         | Test          |
| INF040 | 12  | White     | M   | Osteomyelitis, Bacteremia            | Cefazolin                          | Training      |
| INF043 | 7   | Black     | M   | Hip abscess, Bacteremia              | Vancomycin, Rifampin               | Training      |
| INF062 | 2   | White     | M   | Osteomyelitis                        | Clindamycin                        | Test          |
| INF066 | 3 m | Black     | F   | Pneumonia                            | Vancomycin, Gentamicin             | Test          |
| INF067 | 7   | White     | F   | Osteomyelitis, Bacteremia            | Vancomycin, Rifampin               | Training      |
| INF069 | 9 m | Hispanic  | M   | Lung abscess                         | Vancomycin, Cefazolin              | Test          |
| INF070 | 15m | White     | F   | Abscess                              | Vancomycin                         | Test          |
| INF084 | 18  | Black     | F   | Abscess                              | Cefazolin                          | Training      |
| INF088 | 11m | Hispanic  | M   | Osteomyelitis, bacteremia            | Vancomycin                         | Test          |
| INF089 | 4m  | Black     | F   | Abscess                              | Clindamycin                        | Test          |
| INF090 | 8m  | Black     | M   | Septic arthritis                     | Oxacillin                          | Test          |
| INF150 | 9   | Black     | F   | Osteomyelitis, Bacteremia            | Vancomycin, Rifampin               | Training      |
| INF179 | 12  | White     | M   | Endocarditis, Bacteremia.            | Oxacillin, Gentamicin, Rifampin    | Test          |
| INF205 | 7   | Hispanic  | M   | Pneumonia, Bacteremia                | Vancomycin                         | Training      |
| INF206 | 1   | Hispanic  | F   | Abscess                              | Clindamycin                        | Test          |
| INF208 | 10  | White     | F   | Osteomyelitis, Bacteremia, pneumonia | Clindamycin, Rifampin, Vancomycin  | Training      |
| INF216 | 10  | Hispanic  | F   | Osteomyelitis, Bacteremia            | Vancomycin, Rifampin               | Training      |
| INF220 | 11  | Hispanic  | M   | Osteomyelitis, Bacteremia            | Cefazolin, Rifampin                | Training      |
| INF221 | 6   | Black     | F   | Osteomyelitis, Bacteremia            | Vancomycin, Rifampin               | Training      |
| INF224 | 10  | White     | M   | Osteomyelitis, Bacteremia            | Oxacillin, Rifampin                | Training      |
| INF241 | 10m | Black     | F   | Pneumonia, Bacteremia                | Vancomycin, Rifampin               | Test          |
| INF242 | 13m | Black     | M   | Abscess, Bacteremia                  | Clindamycin                        | Test          |
| INF258 | 8   | White     | F   | Osteomyelitis, Bacteremia            | Cefazolin                          | Training      |
| INF262 | 13  | Hispanic  | M   | Abscess, Bacteremia                  | Clindamycin                        | Test          |
| INF264 | 13  | Black     | M   | Septic arthritis                     | gentamicin, Vancomycin, cefazolin, | Test          |
| INF271 | 13  | Black     | M   | Osteomyelitis                        | Clindamycin                        | Test          |
| INF281 | 3   | White     | F   | Osteomyelitis                        | Clindamycin                        | Training      |
| INF315 | 3   | Hispanic  | F   | Cellulitis                           | Vancomycin                         | Training      |

## ***S. pneumoniae* patients**

| Sample | Age | Ethnicity | Sex | Clinical disease              | Medication                      | Meta-analysis |
|--------|-----|-----------|-----|-------------------------------|---------------------------------|---------------|
| INF009 | 4m  | White     | M   | Abscess                       | Cefazolin                       | Training      |
| INF025 | 2m  | Hispanic  | M   | Meningitis                    | Ampicillin,Ceftriaxone          | Test          |
| INF041 | 23m | White     | F   | Pneumonia,Empyema             | Ceftriaxone                     | Training      |
| INF096 | 16m | Hispanic  | M   | Pneumonia,Empyema             | Ceftriaxone,Azithromycin        | Training      |
| INF113 | 7m  | Hispanic  | F   | Septic arthritis              | Ceftriaxone,clindamycin         | Training      |
| INF155 | 3m  | Hispanic  | M   | Meningitis                    | Ceftriaxone,Vancomycin          | Test          |
| INF261 | 13  | White     | M   | Meningitis                    | Ceftriaxone,vancomycin          | Training      |
| INF265 | 2   | White     | F   | Empyema                       | Ceftriaxone,vancomycin          | Training      |
| INF268 | 3   | Hispanic  | M   | Empyema                       | Ceftriaxone,clindamycin         | Training      |
| INF277 | 16  | White     | M   | Empyema                       | Ceftriaxone,vancomycin          | Training      |
| INF287 | 3   | White     | F   | Pneumonia,bacteremia          | Ceftriaxone,vancomycin          | Training      |
| INF289 | 2   | Hispanic  | M   | Empyema                       | Ceftriaxone,vancomycin          | Training      |
| INF338 | 1   | White     | M   | Meningitis, bacteremia        | Ceftriaxone,vancomycin,Rifampin | Test          |
| INF339 | 2.5 | White     | M   | Mastoiditis, Sinus thrombosis | Ceftriaxone                     | Test          |
| INF388 | 6m  | White     | M   | Meningitis                    | Ceftriaxone,vancomycin,Rifampin | Test          |

## **Influenza A patients**

| Sample | Age  | Ethnicity | Sex | Clinical disease                     | Medication                         | Meta-analysis |
|--------|------|-----------|-----|--------------------------------------|------------------------------------|---------------|
| INF055 | 11m  | Hispanic  | M   | Respiratory distress                 | Cefuroxime                         | Training      |
| INF087 | 19m  | White     | F   | Fever,Hypoxia                        | Cefuroxime                         | Training      |
| INF092 | 1m   | Hispanic  | F   | Fever                                | Ampicillin,Ceftriaxone             | Test          |
| INF095 | 4 y  | Hispanic  | M   | Fever                                | None                               | Training      |
| INF101 | 4m   | Hispanic  | M   | Fever,URI                            | Cefuroxime,Oseltamivir             | Test          |
| INF104 | 17m  | Hispanic  | M   | Seizures, Fever, Respiratory failure | Ceftriaxone                        | Training      |
| INF105 | 4 y  | Hispanic  | F   | Fever,Encephalopathy                 | Ceftriaxone,Aciclovir, Oseltamivir | Training      |
| INF107 | 1.5m | Asian     | M   | Fever,Lethargy                       | Ampicillin,Ceftriaxone             | Test          |
| INF108 | 5m   | Hispanic  | M   | Fever                                | Ceftriaxone                        | Test          |
| INF112 | 1m   | Hispanic  | M   | Fever,URI                            | Ampicillin,Gentamycin              | Test          |
| INF114 | 18m  | Black     | F   | Respiratory distress,fever           | Cefuroxime,Oseltamivir             | Training      |
| INF115 | 20m  | White     | M   | Seizures                             | Amoxicillin                        | Training      |
| INF116 | 2 y  | White     | M   | Fever,URI                            | Cefuroxime,Clindamycin             | Test          |
| INF117 | 24 m | White     | F   | Fever                                | None                               | Training      |
| INF128 | 11m  | Hispanic  | F   | Fever,Hypoxia                        | Cefuroxime                         | Training      |
| INF132 | 6m   | White     | M   | Respiratory distress,fever           | Oxacillin,Tobramycin               | Training      |
| INF259 | 3m   | Hispanic  | F   | Pneumonia                            | None                               | Test          |
| INF266 | 36 m | White     | F   | Fever,cough                          | None                               | Test          |

## E. coli patients

| Sample | Age   | Ethnicity | Sex | Clinical disease      | Medication                        | Meta-analysis |
|--------|-------|-----------|-----|-----------------------|-----------------------------------|---------------|
| INF012 | 5m    | Black     | M   | Bacteremia            | Ceftriaxone                       | Training      |
| INF013 | 5m    | White     | F   | UTI                   | Ceftriaxone                       | Training      |
| INF031 | 3m    | Hispanic  | F   | UTI,bacteremia        | Gentamicin                        | Test          |
| INF034 | 16 y  | White     | F   | Pyelonephritis        | Gentamicin                        | Training      |
| INF048 | 2m    | White     | M   | UTI                   | Ampicillin,ceftriaxone            | Test          |
| INF057 | 3m    | Black     | F   | UTI,bacteremia        | Gentamicin                        | Test          |
| INF074 | 4m    | Hispanic  | F   | UTI,bacteremia        | Ceftriaxone                       | Test          |
| INF082 | 2m    | Hispanic  | M   | UTI                   | Ampicillin,ceftriaxone            | Test          |
| INF086 | 3m    | Hispanic  | M   | UTI                   | Ceftriaxone                       | Training      |
| INF118 | 1.5m  | White     | M   | UTI                   |                                   | Test          |
| INF120 | 1.5m  | Hispanic  | M   | UTI                   | Ampicillin,ceftriaxone            | Test          |
| INF133 | 2m    | Hispanic  | M   | UTI                   | Ceftriaxone                       | Training      |
| INF139 | 1m    | Hispanic  | M   | UTI                   | Ampicillin,ceftriaxone            | Test          |
| INF148 | 8 y   | Hispanic  | F   | UTI                   | Ceftriaxone                       | Training      |
| INF151 | 1.5m  | Hispanic  | M   | UTI                   | Ampicillin,gentamicin             | Test          |
| INF152 | 2.5m  | Black     | M   | Bacteremia,meningitis | Ceftriaxone,gentamicin            | Test          |
| INF154 | 2m    | Hispanic  | M   | UTI                   | Ceftriaxone                       | Training      |
| INF156 | 3 m   | Hispanic  | M   | UTI                   |                                   | Training      |
| INF161 | 1.7m  | Hispanic  | M   | UTI                   | Ampicillin,ceftriaxone            | Test          |
| INF168 | 3m    | White     | F   | UTI                   | Ceftriaxone                       | Test          |
| INF171 | 3m    | Hispanic  | F   | UTI                   | Ceftriaxone                       | Test          |
| INF175 | 0.5m  | Hispanic  | F   | UTI, bacteremia       | Ceftriaxone                       | Test          |
| INF180 | 1m    | Hispanic  | M   | UTI                   | Ampicillin,gentamicin             | Test          |
| INF183 | 1.5m  | Hispanic  | M   | UTI                   | Ampicillin,gentamicin,ceftriaxone | Test          |
| INF184 | 0.5m  | White     | F   | UTI, bacteremia       | Ampicillin,gentamicin             | Test          |
| INF188 | 1.5m  | White     | M   | UTI                   | Ampicillin,gentamicin,ceftriaxone | Test          |
| INF197 | 1.25m | White     | M   | UTI                   | Ampicillin,gentamicin             | Test          |
| INF219 | 5m    | White     | F   | UTI, bacteremia       | Ceftriaxone                       | Training      |
| INF222 | 3m    | Hispanic  | F   | UTI, bacteremia       | Ceftriaxone,gentamicin            | Test          |
| INF229 | 4m    | Hispanic  | F   | UTI, bacteremia       | Ceftriaxone                       | Training      |

## SLE patients

| Sample | Age | Ethnicity | Sex | SLEDAI | Medication                        | Meta-analysis |
|--------|-----|-----------|-----|--------|-----------------------------------|---------------|
| SLE36  | 16  | Hispanic  | F   | 20     | None                              | Training      |
| SLE61  | 16  | Black     | M   | 10     | Steroids PO, Cellcept             | Test          |
| SLE149 | 15  | Other     | M   | 20     | None                              | Test          |
| SLE56  | 17  | Black     | F   | 20     | Steroids PO and IV, Cytoxan       | Test          |
| SLE83  | 8   | Black     | F   | 2      | Steroids PO                       | Test          |
| SLE35  | 16  | Hispanic  | M   | 8      | Steroids PO and IV and Cellcept   | Test          |
| SLE88  | 13  | White     | F   | 18     | Steroids PO and IV, Cytoxan       | Training      |
| SLE27  | 13  | Black     | F   | 14     | Steroids PO and Cytoxan           | Test          |
| SLE100 | 13  | Hispanic  | F   | 4      | Steroids PO and IV                | Training      |
| SLE105 | 12  | Hispanic  | F   | 16     | Steroids PO, Cellcept             | Training      |
| SLE106 | 14  | Black     | F   | 4      | Steroids PO                       | Test          |
| SLE108 | 17  | White     | F   | 10     | None                              | Test          |
| SLE111 | 15  | Hispanic  | F   | 18     | None                              | Test          |
| SLE113 | 13  | Asian     | F   | 24     | None                              | Training      |
| SLE114 | 14  | Black     | F   | 14     | None                              | Training      |
| SLE121 | 12  | Hispanic  | F   | 10     | Steroids PO                       | Training      |
| SLE20  | 12  | Black     | F   | 16     | Steroids PO, Cellcept             | Test          |
| SLE31  | 8   | Hispanic  | F   | 8      | None                              | Training      |
| SLE43  | 15  | Hispanic  | F   | 12     | Steroids PO, Cytoxan              | Test          |
| SLE45  | 9   | Black     | F   | 16     | Steroids PO, Cytoxan              | Training      |
| SLE50  | 15  | Black     | F   | 2      | None                              | Test          |
| SLE51  | 13  | Hispanic  | F   | 11     | None                              | Training      |
| SLE53  | 17  | Hispanic  | F   | 2      | Steroids PO                       | Test          |
| SLE57  | 12  | Black     | M   | 10     | Steroids PO, Steroids IV          | Training      |
| SLE60  | 12  | Hispanic  | F   | 4      | Steroids PO, Steroids IV          | Training      |
| SLE62  | 14  | Hispanic  | F   | 2      | Steroids PO, Steroids IV          | Test          |
| SLE67  | 16  | White     | F   | 2      | Imuran                            | Test          |
| SLE74  | 17  | Black     | F   | 6      | Steroids PO                       | Test          |
| SLE75  | 17  | Hispanic  | F   | 6      | None                              | Test          |
| SLE79  | 10  | Hispanic  | F   | 8      | None                              | Training      |
| SLE82  | 17  | Black     | F   | 8      | Steroids PO                       | Test          |
| SLE85  | 16  | Black     | F   | 12     | None                              | Test          |
| SLE90  | 11  | Hispanic  | F   | 4      | Steroids PO, Steroids IV          | Training      |
| SLE91  | 10  | Asian     | F   | 12     | Steroids PO                       | Training      |
| SLE96  | 16  | Hispanic  | F   | 4      | Steroids PO                       | Test          |
| SLE65  | 10  | Hispanic  | F   | 8      | Steroids PO, Steroids IV, Cytoxan | Test          |
| SLE21  | 10  | Hispanic  | F   | 12     | None                              | Test          |
| SLE17  | 14  | Asian     | M   | 2      | Steroids PO                       | Training      |

## Healthy donors

| Sample | Age  | Ethnicity | Sex | SOJIA vs H | Ecoli vs H | Flu vs H | Staph vs H | Strep vs H | SLE vs H | Analysis of significance | Healthy vs SOJIA prediction |
|--------|------|-----------|-----|------------|------------|----------|------------|------------|----------|--------------------------|-----------------------------|
| H46    | 5    | White     | F   | yes        | no         | no       | no         | no         | yes      | Training                 | Training                    |
| H27    | 6    | White     | F   | yes        | no         | no       | no         | no         | yes      | Training                 | Training                    |
| H36    | 7    | White     | F   | yes        | no         | no       | no         | no         | yes      | Training                 | Training                    |
| H37    | 8    | White     | F   | yes        | no         | no       | no         | no         | yes      | Training                 | Training                    |
| H148   | 8    | White     | F   | yes        | no         | no       | no         | no         | yes      | Training                 | Training                    |
| H01    | 8    | Hispanic  | M   | yes        | no         | no       | no         | no         | yes      | Training                 | Training                    |
| H42    | 9    | Hispanic  | M   | yes        | no         | no       | no         | no         | yes      | Training                 | Test                        |
| H30    | 10   | Hispanic  | F   | yes        | no         | no       | no         | no         | yes      | Training                 | Test                        |
| H04    | 10   | White     | F   | no         | no         | no       | no         | no         | no       | Test                     | Test                        |
| H28    | 11   | Hispanic  | F   | no         | no         | no       | no         | no         | no       | Test                     | Test                        |
| H45    | 12   | AA        | F   | no         | no         | no       | no         | no         | no       | Test                     | Test                        |
| H149   | 12   | Hispanic  | M   | yes        | no         | no       | no         | no         | yes      | Training                 | Test                        |
| H02    | 13   | Hispanic  | F   | no         | no         | no       | no         | no         | no       | Test                     | Test                        |
| H150   | 13   | White     | M   | no         | no         | no       | no         | no         | no       | Test                     | Training                    |
| H03    | 14   | White     | M   | yes        | no         | no       | no         | no         | yes      | Training                 | Training                    |
| H98    | 16   | White     | F   | no         | no         | no       | no         | no         | no       | Training                 | Test                        |
| H122   | 14   | White     | F   | no         | no         | no       | no         | no         | no       | Test                     | NA                          |
| H152   | 15   | Hispanic  | F   | no         | no         | no       | no         | no         | no       | Test                     | NA                          |
| H166   | 14   | Hispanic  | F   | no         | no         | no       | no         | no         | no       | Test                     | NA                          |
| H176   | 15   | White     | M   | no         | no         | no       | no         | no         | no       | Test                     | NA                          |
| H178   | 17   | White     | F   | no         | no         | no       | no         | no         | no       | Test                     | NA                          |
| INF45  | 4    | Other     | F   | no         | no         | yes      | no         | yes        | no       | Training                 | NA                          |
| INF11N | 4    | Asian     | F   | no         | no         | yes      | yes        | no         | no       | Training                 | NA                          |
| INF12N | 1.83 | White     | M   | no         | yes        | yes      | no         | yes        | no       | Training                 | NA                          |
| INF19N | 0.25 | Hispanic  | M   | no         | yes        | yes      | no         | yes        | no       | Training                 | NA                          |
| INF20N | 0.83 | Hispanic  | M   | no         | yes        | yes      | no         | no         | no       | Training                 | NA                          |
| INF23N | 7    | Hispanic  | F   | no         | yes        | no       | yes        | no         | no       | Training                 | NA                          |
| INF24N | 3    | White     | M   | no         | no         | no       | yes        | no         | no       | Training                 | NA                          |
| INF25N | 0.91 | Hispanic  | F   | no         | yes        | yes      | no         | no         | no       | Training                 | NA                          |
| INF26N | 7    | Asian     | F   | no         | no         | no       | yes        | no         | no       | Training                 | NA                          |
| INF27N | 0.83 | White     | M   | no         | yes        | no       | no         | yes        | no       | Training                 | NA                          |
| INF3N  | 6    | Hispanic  | M   | no         | no         | no       | yes        | no         | no       | Training                 | NA                          |
| INF 7N | 1.58 | Asian     | F   | no         | yes        | yes      | no         | yes        | no       | Training                 | NA                          |
| INF 8N | 10   | Asian     | M   | no         | no         | no       | yes        | no         | no       | Training                 | NA                          |
| INF204 | 2    | White     | M   | no         | no         | no       | no         | yes        | no       | Training                 | NA                          |
| INF294 | 12   | AA        | F   | no         | no         | no       | yes        | yes        | no       | Training                 | NA                          |
| INF300 | 17   | White     | M   | no         | yes        | yes      | yes        | yes        | no       | Training                 | NA                          |
| INF301 | 8.2  | White     | M   | no         | no         | no       | yes        | no         | no       | Training                 | NA                          |
| INF303 | 6.3  | White     | F   | no         | no         | no       | yes        | no         | no       | Training                 | NA                          |
