# Supplementary material for: Blood leukocyte microarrays to diagnose systemic onset juvenile idiopathic arthritis and follow the response to IL-1 blockade
Source: PubMed Central journal article supplement — J Exp Med. 2007 Sep 3;204(9):2131–44. doi: 10.1084/jem.20070070 (PMC2118700; doi:10.1084/jem.20070070), 2007-09-03
Supplement: jexpmed_jem.20070070_5.pdf [file jexpmed_jem.20070070_5.pdf]

**Table S2. 873 Bonferroni genes from Fig. 1**

| Systematic       | P-value  | Average normalized data in SOJIA | Gene Symbol | Gene Title                                                                                                     |
|------------------|----------|----------------------------------|-------------|----------------------------------------------------------------------------------------------------------------|
| <b>Transport</b> |          |                                  |             |                                                                                                                |
| 209994_s_at      | 8.03E-05 | 0.5                              | ABCB1       | ATP-binding cassette, sub-family B (MDR/TAP), member 1                                                         |
| 233371_at        | 8.96E-06 | 20.1                             | ABCC13      | ATP-binding cassette, sub-family C (CFTR/MRP), member 13                                                       |
| 201613_s_at      | 0.000528 | 0.6                              | AP1G2       | adaptor-related protein complex 1, gamma 2 subunit                                                             |
| 223237_x_at      | 8.07E-05 | 4.2                              | AP2A1       | adaptor-related protein complex 2, alpha 1 subunit                                                             |
| 205568_at        | 1.61E-05 | 5.1                              | AQP9        | aquaporin 9                                                                                                    |
| 208764_s_at      | 0.000214 | 0.6                              | ATP5G2      | ATP synthase, H+ transporting, mitochondrial F0 complex, subunit c (subunit 9), isoform 2                      |
| 200818_at        | 0.00806  | 0.7                              | ATP5O       | ATP synthase, H+ transporting, mitochondrial F1 complex, O subunit (oligomycin sensitivity conferring protein) |
| 212383_at        | 0.00803  | 1.9                              | ATP6V0A1    | ATPase, H+ transporting, lysosomal V0 subunit a isoform 1                                                      |
| 208898_at        | 0.000528 | 1.7                              | ATP6V1D     | ATPase, H+ transporting, lysosomal 34kDa, V1 subunit D                                                         |
| 243615_at        | 0.00566  | 1.7                              | ATP9B       | ATPase, Class II, type 9B                                                                                      |
| 223649_s_at      | 1.30E-06 | 12.0                             | CGI-69*     | CGI-69 protein                                                                                                 |
| 213415_at        | 0.000214 | 8.3                              | CLIC2       | chloride intracellular channel 2                                                                               |
| 209143_s_at      | 0.0027   | 0.7                              | CLNS1A      | chloride channel, nucleotide-sensitive, 1A                                                                     |
| 223450_s_at      | 0.000214 | 0.6                              | COG3        | component of oligomeric golgi complex 3                                                                        |
| 201134_x_at      | 0.000214 | 0.5                              | COX7C       | Cytochrome c oxidase subunit VIIc                                                                              |
| 217491_x_at      | 0.00393  | 0.5                              | COX7C       | Cytochrome c oxidase subunit VIIc                                                                              |
| 229588_at        | 0.000337 | 0.7                              | DNAJC10     | DnaJ (Hsp40) homolog, subfamily C, member 10                                                                   |
| 209046_s_at      | 2.82E-05 | 2.6                              | GABARAPL2   | GABA(A) receptor-associated protein-like 2                                                                     |
| 210119_at        | 0.000214 | 7.2                              | KCNJ15      | potassium inwardly-rectifying channel, subfamily J, member 15                                                  |
| 227934_at        | 0.00269  | 0.5                              | KPNA5       | Karyopherin alpha 5 (importin alpha 6)                                                                         |
| 228841_at        | 0.00566  | 0.6                              | LOC90624    | Hypothetical protein LOC90624                                                                                  |
| 201412_at        | 2.56E-06 | 1.6                              | LRP10       | low density lipoprotein receptor-related protein 10                                                            |
| 225008_at        | 0.00123  | 2.1                              | MGC34646    | Hypothetical protein MGC34646                                                                                  |
| 212472_at        | 0.000214 | 5.0                              | MICAL2      | Flavoprotein oxidoreductase MICAL2                                                                             |
| 212473_s_at      | 1.61E-05 | 4.4                              | MICAL2      | Flavoprotein oxidoreductase MICAL2                                                                             |
| 218136_s_at      | 1.30E-06 | 8.1                              | MSCP        | mitochondrial solute carrier protein                                                                           |
| 218978_s_at      | 4.86E-06 | 7.5                              | MSCP        | mitochondrial solute carrier protein                                                                           |
| 221920_s_at      | 1.30E-06 | 16.0                             | MSCP*       | mitochondrial solute carrier protein                                                                           |
| 222528_s_at      | 1.30E-06 | 24.3                             | MSCP*       | mitochondrial solute carrier protein                                                                           |
| 222529_at        | 0.000133 | 10.3                             | MSCP        | mitochondrial solute carrier protein                                                                           |
| 231078_at        | 1.30E-06 | 25.8                             | MSCP        | Mitochondrial solute carrier protein                                                                           |
| 206491_s_at      | 0.00123  | 1.6                              | NAPA        | N-ethylmaleimide-sensitive factor attachment protein, alpha                                                    |
| 205147_x_at      | 0.00566  | 1.9                              | NCF4        | neutrophil cytosolic factor 4, 40kDa                                                                           |
| 207677_s_at      | 0.00393  | 2.5                              | NCF4        | neutrophil cytosolic factor 4, 40kDa                                                                           |
| 201226_at        | 0.00123  | 0.6                              | NDUFB8      | NADH dehydrogenase (ubiquinone) 1 beta subcomplex, 8, 19kDa                                                    |
| 200063_s_at      | 2.56E-06 | 0.5                              | NPM1        | nucleophosmin (nucleolar phosphoprotein B23, numatrin)                                                         |
| 223432_at        | 1.30E-06 | 10.9                             | OSBP2       | oxysterol binding protein 2                                                                                    |
| 218047_at        | 0.00806  | 0.7                              | OSBPL9      | oxysterol binding protein-like 9                                                                               |
| 218676_s_at      | 8.07E-05 | 3.5                              | PCTP        | phosphatidylcholine transfer protein                                                                           |
| 202880_s_at      | 0.00183  | 0.7                              | PSCD1       | pleckstrin homology, Sec7 and coiled-coil domains 1(cytohesin 1)                                               |
| 225074_at        | 1.30E-06 | 3.5                              | RAB2B*      | RAB2B, member RAS oncogene family                                                                              |

|             |          |      |         |                                                                                                                                                                       |
|-------------|----------|------|---------|-----------------------------------------------------------------------------------------------------------------------------------------------------------------------|
| 203582_s_at | 0.00806  | 0.6  | RAB4A   | RAB4A, member RAS oncogene family                                                                                                                                     |
| 221808_at   | 0.00183  | 0.7  | RAB9A   | RAB9A, member RAS oncogene family                                                                                                                                     |
| 202845_s_at | 0.00081  | 2.3  | RALBP1  | ralA binding protein 1                                                                                                                                                |
| 228548_at   | 0.00806  | 0.8  | RAP1A   | RAP1A, member of RAS oncogene family                                                                                                                                  |
| 227366_at   | 2.82E-05 | 2.3  | RILP    | Rab interacting lysosomal protein                                                                                                                                     |
| 206196_s_at | 0.0027   | 3.2  | RPIP8   | RaP2 interacting protein 8                                                                                                                                            |
| 208456_s_at | 8.03E-05 | 0.5  | RRAS2   | related RAS viral (r-ras) oncogene homolog 2                                                                                                                          |
| 202084_s_at | 0.000339 | 1.7  | SEC14L1 | SEC14-like 1 (S. cerevisiae)                                                                                                                                          |
| 202798_at   | 0.000339 | 0.6  | SEC24B  | SEC24 related gene family, member B (S. cerevisiae)                                                                                                                   |
| 215009_s_at | 0.000528 | 0.5  | SEC31L1 | SEC31-like 1 (S. cerevisiae)                                                                                                                                          |
| 219349_s_at | 0.00081  | 0.6  | SEC5L1  | SEC5-like 1 (S. cerevisiae)                                                                                                                                           |
| 205856_at   | 0.000337 | 8.3  | SLC14A1 | solute carrier family 14 (urea transporter), member 1                                                                                                                 |
| 229151_at   | 0.00123  | 8.7  | SLC14A1 | Solute carrier family 14 (urea transporter), member 1                                                                                                                 |
| 205896_at   | 1.30E-06 | 5.2  | SLC22A4 | solute carrier family 22 (organic cation transporter), member 4                                                                                                       |
| 231625_at   | 0.00122  | 1.7  | SLC22A9 | solute carrier family 22 (organic anion/cation transporter), member 9                                                                                                 |
| 202433_at   | 0.00566  | 1.4  | SLC35B1 | solute carrier family 35, member B1                                                                                                                                   |
| 218237_s_at | 0.0027   | 0.6  | SLC38A1 | solute carrier family 38, member 1                                                                                                                                    |
| 205592_at   | 1.30E-06 | 64.2 | SLC4A1  | Solute carrier family 4, anion exchanger, member 1                                                                                                                    |
| 210854_x_at | 1.30E-06 | 9.2  | SLC6A8  | solute carrier family 6 member 8                                                                                                                                      |
| 213843_x_at | 4.86E-06 | 10.2 | SLC6A8  | solute carrier family 6 member 8                                                                                                                                      |
| 210357_s_at | 0.000528 | 6.9  | SMOX    | spermine oxidase                                                                                                                                                      |
| 208781_x_at | 0.0027   | 2.5  | SNX3    | sorting nexin 3                                                                                                                                                       |
| 210648_x_at | 0.00806  | 1.9  | SNX3    | sorting nexin 3                                                                                                                                                       |
| 213545_x_at | 0.00566  | 2.1  | SNX3    | sorting nexin 3                                                                                                                                                       |
| 212807_s_at | 0.00183  | 2.0  | SORT1   | sortilin 1                                                                                                                                                            |
| 209367_at   | 0.000133 | 2.3  | STXBP2  | syntaxin binding protein 2                                                                                                                                            |
| 201260_s_at | 0.00806  | 0.7  | SYPL    | synaptophysin-like protein                                                                                                                                            |
| 218188_s_at | 0.000528 | 0.6  | TIMM13  | Translocase of inner mitochondrial membrane 13 homolog (yeast)<br>translocase of outer mitochondrial membrane 7 homolog (yeast) ///<br>hypothetical protein LOC201725 |
| 201812_s_at | 0.00183  | 0.6  | TOMM7   |                                                                                                                                                                       |
| 205708_s_at | 0.00806  | 2.3  | TRPM2   | transient receptor potential cation channel, subfamily M, member 2                                                                                                    |
| 205849_s_at | 0.000339 | 0.7  | UQCRB   | ubiquinol-cytochrome c reductase binding protein                                                                                                                      |
| 209066_x_at | 0.000133 | 0.5  | UQCRB   | ubiquinol-cytochrome c reductase binding protein<br>vesicle transport through interaction with t-SNAREs homolog 1B<br>(yeast)                                         |
| 209452_s_at | 0.00566  | 1.9  | VTI1B   |                                                                                                                                                                       |
| 206698_at   | 0.000214 | 7.1  | XK      | Kell blood group precursor (McLeod phenotype)                                                                                                                         |

### Ubiquitin

|             |          |     |          |                                                         |
|-------------|----------|-----|----------|---------------------------------------------------------|
| 210075_at   | 0.000807 | 2.6 | 2-3      | membrane-associated ring finger (C3HC4) 2               |
| 221824_s_at | 4.82E-05 | 6.5 | 8-3      | membrane-associated ring finger (C3HC4) 8               |
| 231933_at   | 4.86E-06 | 5.1 | 8-3      | membrane-associated ring finger (C3HC4) 8               |
| 202268_s_at | 0.000214 | 0.7 | APPBP1   | amyloid beta precursor protein binding protein 1, 59kDa |
| 204190_at   | 0.000528 | 0.6 | C13orf22 | chromosome 13 open reading frame 22                     |
| 217988_at   | 1.30E-06 | 0.5 | CCNB1IP1 | cyclin B1 interacting protein 1                         |
| 212540_at   | 1.30E-06 | 3.8 | CDC34*   | cell division cycle 34                                  |
| 207231_at   | 0.00123  | 0.6 | DZIP3    | zinc finger DAZ interacting protein 3                   |
| 213186_at   | 0.0027   | 0.6 | DZIP3    | zinc finger DAZ interacting protein 3                   |
| 201178_at   | 1.30E-06 | 5.3 | FBXO7    | F-box protein 7                                         |
| 210638_s_at | 1.30E-06 | 2.2 | FBXO9*   | F-box protein 9                                         |
| 218373_at   | 4.82E-05 | 0.5 | FTS      | fused toes homolog (mouse)                              |
| 239101_at   | 0.00183  | 0.4 | ITCH     | itchy homolog E3 ubiquitin protein ligase (mouse)       |
| 209845_at   | 2.56E-06 | 4.2 | MKRN1    | makorin, ring finger protein, 1                         |

|             |          |      |         |                                                                            |
|-------------|----------|------|---------|----------------------------------------------------------------------------|
| 201285_at   | 1.30E-06 | 3.8  | MKRN1*  | makorin, ring finger protein, 1                                            |
| 202219_at   | 1.30E-06 | 78.3 | SLC6A8* | solute carrier family 6 (neurotransmitter transporter, creatine), member 8 |
| 227935_s_at | 0.00183  | 3.2  | PCGF5   | polycomb group ring finger 5                                               |
| 216088_s_at | 4.86E-06 | 0.6  | PSMA7   | Proteasome (prosome, macropain) subunit, alpha type, 7                     |
| 201052_s_at | 0.00393  | 3.4  | PSMF1   | Proteasome (prosome, macropain) inhibitor subunit 1 (PI31)                 |
| 218247_s_at | 0.00806  | 0.5  | RKHD2   | ring finger and KH domain containing 2                                     |
| 207801_s_at | 4.86E-06 | 5.4  | RNF10   | ring finger protein 10                                                     |
| 208632_at   | 0.000133 | 3.2  | RNF10   | ring finger protein 10                                                     |
| 221063_x_at | 8.07E-05 | 3.1  | RNF123  | ring finger protein 123                                                    |
| 202318_s_at | 0.00183  | 0.7  | SENP6   | SUMO1/sentrin specific protease 6                                          |
| 214790_at   | 4.79E-05 | 0.5  | SENP6   | SUMO1/sentrin specific protease 6                                          |
| 226366_at   | 0.00806  | 0.7  | SHPRH   | SNF2 histone linker PHD RING helicase                                      |
| 209339_at   | 1.30E-06 | 9.0  | SIAH2*  | seven in absentia homolog 2 (Drosophila)                                   |
| 232665_x_at | 0.000133 | 5.1  | SMURF1  | SMAD specific E3 ubiquitin protein ligase 1                                |
| 215047_at   | 1.30E-06 | 37.9 | TRIM58  | tripartite motif-containing 58                                             |
| 208661_s_at | 8.07E-05 | 0.5  | TTC3    | tetratricopeptide repeat domain 3                                          |
| 208662_s_at | 0.00081  | 0.6  | TTC3    | tetratricopeptide repeat domain 3                                          |
| 222420_s_at | 0.00393  | 4.2  | UBE2H   | ubiquitin-conjugating enzyme E2H (UBC8 homolog, yeast)                     |
| 201534_s_at | 0.00081  | 0.4  | UBL3    | ubiquitin-like 3                                                           |
| 223117_s_at | 0.000528 | 0.7  | USP47   | ubiquitin specific protease 47                                             |
| 211678_s_at | 2.82E-05 | 0.6  | ZNF313  | zinc finger protein 313                                                    |

### Heme/Hemoglobin

|             |          |       |               |                                             |
|-------------|----------|-------|---------------|---------------------------------------------|
| 203115_at   | 4.86E-06 | 9.8   | FECH          | ferrochelatase (protoporphyrin)             |
| 203116_s_at | 1.30E-06 | 6.6   | FECH*         | ferrochelatase (protoporphyrin)             |
| 211699_x_at | 0.00566  | 3.4   | HBA1 /// HBA2 | Hemoglobin, alpha 1 /// hemoglobin, alpha 2 |
| 206834_at   | 1.30E-06 | 36.4  | HBD*          | Hemoglobin, delta /// hemoglobin, delta     |
| 204848_x_at | 1.30E-06 | 65.7  | HBG1 /// HBG2 | Hemoglobin, gamma A /// hemoglobin, gamma G |
| 204419_x_at | 1.30E-06 | 48.9  | HBG2          | Hemoglobin, gamma G                         |
| 213515_x_at | 2.56E-06 | 22.0  | HBG2          | Hemoglobin, gamma G                         |
| 240336_at   | 1.30E-06 | 161.6 | HBM           | Hemoglobin mu chain                         |

### Immune Response

|             |          |      |         |                                                                                  |
|-------------|----------|------|---------|----------------------------------------------------------------------------------|
| 205098_at   | 0.000133 | 2.6  | CCR1    | chemokine (C-C motif) receptor 1                                                 |
| 205297_s_at | 0.0027   | 0.5  | CD79B   | CD79B antigen (immunoglobulin-associated beta)                                   |
| 209498_at   | 4.82E-05 | 8.1  | CEACAM1 | carcinoembryonic antigen-related cell adhesion molecule 1 (biliary glycoprotein) |
| 211883_x_at | 0.00806  | 3.1  | CEACAM1 | carcinoembryonic antigen-related cell adhesion molecule 1 (biliary glycoprotein) |
| 239205_s_at | 0.00183  | 4.5  | CR1     | complement component (3b/4b) receptor 1, including Knops blood group system      |
| 204470_at   | 0.00183  | 3.1  | CXCL1   | chemokine (C-X-C motif) ligand 1 (melanoma growth stimulating activity, alpha)   |
| 211734_s_at | 4.86E-06 | 0.3  | FCER1A  | Fc fragment of IgE, high affinity I, receptor for; alpha polypeptide             |
| 214511_x_at | 1.30E-06 | 4.1  | FCGR1A  | Fc fragment of IgG, high affinity Ia, receptor (CD64)                            |
| 216950_s_at | 1.30E-06 | 4.2  | FCGR1A* | Fc fragment of IgG, high affinity Ia, receptor (CD64)                            |
| 203932_at   | 1.30E-06 | 0.5  | HLA-DMB | major histocompatibility complex, class II, DM beta                              |
| 208894_at   | 0.0027   | 0.6  | HLA-DRA | major histocompatibility complex, class II, DR alpha                             |
| 210982_s_at | 0.00393  | 0.7  | HLA-DRA | major histocompatibility complex, class II, DR alpha                             |
| 217456_x_at | 1.30E-06 | 0.6  | HLA-E*  | major histocompatibility complex, class I, E                                     |
| 204806_x_at | 1.30E-06 | 0.6  | HLA-F*  | major histocompatibility complex, class I, F                                     |
| 221875_x_at | 0.00566  | 0.8  | HLA-F   | major histocompatibility complex, class I, F                                     |
| 210514_x_at | 2.82E-05 | 0.3  | HLA-G   | HLA-G histocompatibility antigen, class I, G                                     |
| 202411_at   | 0.000339 | 15.7 | IFI27   | interferon, alpha-inducible protein 27                                           |

|             |          |     |          |                                                                                                    |
|-------------|----------|-----|----------|----------------------------------------------------------------------------------------------------|
| 212657_s_at | 1.30E-06 | 3.2 | IL1RN*   | interleukin 1 receptor antagonist                                                                  |
| 206881_s_at | 0.00806  | 2.8 | LILRA3   | leukocyte immunoglobulin-like receptor, subfamily A (without TM domain), member 3                  |
| 210784_x_at | 0.0027   | 1.8 | LILRB3   | leukocyte immunoglobulin-like receptor, subfamily B (with TM and ITIM domains), member 3           |
| 211133_x_at | 0.00806  | 1.9 | LILRB3   | leukocyte immunoglobulin-like receptor, subfamily B (with TM and ITIM domains), member 3           |
| 211135_x_at | 4.82E-05 | 2.2 | LILRB3   | leukocyte immunoglobulin-like receptor, subfamily B (with TM and ITIM domains), member 3           |
| 207339_s_at | 8.07E-05 | 0.5 | LTB      | Lymphotoxin beta (TNF superfamily, member 3)                                                       |
| 206584_at   | 2.56E-06 | 2.1 | LY96     | lymphocyte antigen 96                                                                              |
| 243099_at   | 4.86E-06 | 1.9 | NFAM1    | NFAT activating protein with ITAM motif 1                                                          |
| 205863_at   | 0.00183  | 3.2 | S100A12  | S100 calcium binding protein A12 (calgranulin C)                                                   |
| 211429_s_at | 0.00183  | 1.6 | SERPINA1 | serine (or cysteine) proteinase inhibitor, clade A (alpha-1 antiproteinase, antitrypsin), member 1 |
| 206025_s_at | 0.000133 | 4.4 | TNFAIP6  | tumor necrosis factor, alpha-induced protein 6                                                     |
| 206026_s_at | 0.000133 | 5.1 | TNFAIP6  | tumor necrosis factor, alpha-induced protein 6                                                     |
| 210915_x_at | 8.07E-05 | 0.6 | TRBC1    | T cell receptor beta constant 1                                                                    |
| 211796_s_at | 4.82E-05 | 0.6 | TRBC1    | T cell receptor beta constant 1                                                                    |
| 213193_x_at | 2.82E-05 | 0.7 | TRBC1    | T cell receptor beta constant 1                                                                    |

## Metabolism

|             |          |      |            |                                                                                                                                        |
|-------------|----------|------|------------|----------------------------------------------------------------------------------------------------------------------------------------|
| 214274_s_at | 0.0027   | 0.7  | ACAA1      | acetyl-Coenzyme A acyltransferase 1 (peroxisomal 3-oxoacyl-Coenzyme A thiolase)                                                        |
| 201963_at   | 0.000214 | 4.0  | ACSL1      | acyl-CoA synthetase long-chain family member 1                                                                                         |
| 207275_s_at | 4.86E-06 | 5.5  | ACSL1      | acyl-CoA synthetase long-chain family member 1                                                                                         |
| 217748_at   | 1.30E-06 | 9.3  | ADIPOR1    | adiponectin receptor 1                                                                                                                 |
| 202912_at   | 1.61E-05 | 6.6  | ADM        | adrenomedullin                                                                                                                         |
| 202144_s_at | 8.07E-05 | 0.7  | ADSL       | adenylosuccinate lyase                                                                                                                 |
| 208498_s_at | 0.000133 | 0.4  | AMY2A      | amylase, alpha 2A; pancreatic                                                                                                          |
| 221485_at   | 0.0027   | 2.2  | B4GALT5    | UDP-Gal:betaGlcNAc beta 1,4- galactosyltransferase, polypeptide 5                                                                      |
| 203502_at   | 1.61E-05 | 8.5  | BPGM       | 2,3-bisphosphoglycerate mutase                                                                                                         |
| 235802_at   | 1.30E-06 | 0.4  | C14orf175* | chromosome 14 open reading frame 175                                                                                                   |
| 220751_s_at | 2.82E-05 | 9.0  | C5orf4     | chromosome 5 open reading frame 4                                                                                                      |
| 205950_s_at | 1.30E-06 | 75.6 | CA1*       | carbonic anhydrase I                                                                                                                   |
| 224060_s_at | 4.82E-05 | 0.6  | CGI-30     | CGI-30 protein                                                                                                                         |
| 208791_at   | 0.00123  | 2.5  | CLU        | clusterin (complement lysis inhibitor, SP-40,40, sulfated glycoprotein 2, testosterone-repressed prostate message 2, apolipoprotein J) |
| 209759_s_at | 4.82E-05 | 0.5  | DCI        | dodecenoyl-Coenzyme A delta isomerase (3,2 trans-enoyl-Coenzyme A isomerase)                                                           |
| 203302_at   | 0.00183  | 0.6  | DCK        | deoxycytidine kinase                                                                                                                   |
| 206335_at   | 0.00182  | 1.6  | GALNS      | galactosamine (N-acetyl)-6-sulfate sulfatase (Morquio syndrome, mucopolysaccharidosis type IVA)                                        |
| 207387_s_at | 0.00183  | 2.5  | GK         | glycerol kinase                                                                                                                        |
| 214430_at   | 0.00566  | 1.3  | GLA        | galactosidase, alpha                                                                                                                   |
| 201576_s_at | 0.00081  | 1.5  | GLB1       | galactosidase, beta 1                                                                                                                  |
| 204187_at   | 1.30E-06 | 18.8 | GMPR       | guanosine monophosphate reductase                                                                                                      |
| 201554_x_at | 4.82E-05 | 2.7  | GYG        | Glycogenin                                                                                                                             |
| 211275_s_at | 8.07E-05 | 2.4  | GYG        | Glycogenin                                                                                                                             |
| 200697_at   | 0.00123  | 1.9  | HK1        | hexokinase 1                                                                                                                           |
| 205936_s_at | 4.86E-06 | 2.8  | HK3        | hexokinase 3 (white cell)                                                                                                              |
| 219403_s_at | 0.00393  | 2.1  | HPSE       | Heparanase                                                                                                                             |
| 201193_at   | 0.00123  | 2.0  | IDH1       | isocitrate dehydrogenase 1 (NADP+), soluble                                                                                            |
| 218847_at   | 8.96E-06 | 9.1  | IMP-2      | IGF-II mRNA-binding protein 2                                                                                                          |
| 201892_s_at | 8.96E-06 | 0.5  | IMPDH2     | IMP (inosine monophosphate) dehydrogenase 2                                                                                            |
| 202068_s_at | 2.82E-05 | 2.3  | LDLR       | low density lipoprotein receptor (familial hypercholesterolemia)                                                                       |

|             |          |      |         |                                                                                |
|-------------|----------|------|---------|--------------------------------------------------------------------------------|
| 217956_s_at | 0.00123  | 0.6  | MASA    | E-1 enzyme                                                                     |
| 206522_at   | 0.0027   | 11.9 | MGAM    | maltase-glucoamylase (alpha-glucosidase)                                       |
| 226214_at   | 0.0027   | 2.0  | MIR16   | membrane interacting protein of RGS16                                          |
| 201695_s_at | 1.61E-05 | 4.1  | NP      | nucleoside phosphorylase                                                       |
| 218025_s_at | 4.82E-05 | 0.7  | PECI    | Peroxisomal D3,D2-enoyl-CoA isomerase                                          |
| 228499_at   | 0.00123  | 1.7  | PFKFB4  | 6-phosphofructo-2-kinase/fructose-2,6-biphosphatase 4                          |
| 203335_at   | 2.82E-05 | 0.6  | PHYH    | phytanoyl-CoA hydroxylase (Refsum disease)                                     |
| 205570_at   | 2.82E-05 | 5.0  | PIP5K2A | phosphatidylinositol-4-phosphate 5-kinase, type II, alpha                      |
| 202165_at   | 4.82E-05 | 0.5  | PPP1R2  | protein phosphatase 1, regulatory (inhibitor) subunit 2                        |
| 224909_s_at | 0.00183  | 1.7  | PREX1   | phosphatidylinositol 3,4,5-trisphosphate-dependent RAC exchanger 1             |
| 209503_s_at | 0.00393  | 0.7  | PSMC5   | Proteasome (prosome, macropain) 26S subunit, ATPase, 5                         |
| 201195_s_at | 0.00806  | 2.7  | SLC7A5  | solute carrier family 7 (cationic amino acid transporter, y+ system), member 5 |
| 214835_s_at | 0.000528 | 0.6  | SUCLG2  | succinate-CoA ligase, GDP-forming, beta subunit                                |
| 215772_x_at | 0.000339 | 0.6  | SUCLG2  | succinate-CoA ligase, GDP-forming, beta subunit                                |
| 203234_at   | 0.00081  | 2.3  | UPP1    | uridine phosphorylase 1                                                        |

### Transcription

|             |          |     |              |                                                                                                        |
|-------------|----------|-----|--------------|--------------------------------------------------------------------------------------------------------|
| 217729_s_at | 4.82E-05 | 0.5 | AES          | amino-terminal enhancer of split                                                                       |
| 215684_s_at | 0.000214 | 4.7 | ASCC2        | activating signal cointegrator 1 complex subunit 2                                                     |
| 205965_at   | 0.00393  | 1.8 | BATF         | basic leucine zipper transcription factor, ATF-like                                                    |
| 222891_s_at | 0.00123  | 0.4 | BCL11A       | B-cell CLL/lymphoma 11A (zinc finger protein)                                                          |
| 209430_at   | 0.0027   | 0.6 | BTAF1        | BTAF1 RNA polymerase II, B-TFIID transcription factor-associated, 170kDa (Mot1 homolog, S. cerevisiae) |
| 216305_s_at | 0.000339 | 0.6 | C2orf3       | chromosome 2 open reading frame 3                                                                      |
| 202163_s_at | 0.000132 | 0.7 | CNOT8        | CCR4-NOT transcription complex, subunit 8                                                              |
| 237819_at   | 2.56E-06 | 2.8 | CREB3L2      | CAMP responsive element binding protein 3-like 2                                                       |
| 232555_at   | 0.00183  | 3.1 | CREB5        | CAMP responsive element binding protein 5                                                              |
| 201160_s_at | 1.30E-06 | 4.9 | CSDA         | cold shock domain protein A                                                                            |
| 201161_s_at | 1.30E-06 | 9.1 | CSDA         | cold shock domain protein A                                                                            |
| 202521_at   | 0.00392  | 0.7 | CTCF         | CCCTC-binding factor (zinc finger protein)                                                             |
| 239083_at   | 0.00566  | 0.4 | DKFZp7621137 | Hypothetical protein DKFZp7621137                                                                      |
| 203624_at   | 7.99E-05 | 0.7 | DXYS155E     | DNA segment on chromosome X and Y (unique) 155 expressed sequence                                      |
| 217736_s_at | 0.000214 | 2.7 | EIF2AK1      | eukaryotic translation initiation factor 2-alpha kinase 1                                              |
| 232909_s_at | 0.00183  | 0.6 | FALZ         | fetal Alzheimer antigen                                                                                |
| 220760_x_at | 8.96E-06 | 0.6 | FLJ14345     | Hypothetical protein FLJ14345                                                                          |
| 206583_at   | 0.000214 | 0.6 | FLJ20344     | Hypothetical protein FLJ20344                                                                          |
| 206015_s_at | 0.000214 | 0.6 | FOXJ3        | forkhead box J3                                                                                        |
| 204131_s_at | 0.00806  | 5.0 | FOXO3A       | forkhead box O3A                                                                                       |
| 204132_s_at | 0.00183  | 5.3 | FOXO3A       | forkhead box O3A                                                                                       |
| 224891_at   | 0.00183  | 4.3 | FOXO3A       | forkhead box O3A                                                                                       |
| 223287_s_at | 0.000133 | 0.4 | FOXP1        | forkhead box P1                                                                                        |
| 224838_at   | 0.000528 | 0.6 | FOXP1        | forkhead box P1                                                                                        |
| 209604_s_at | 2.82E-05 | 0.5 | GATA3        | GATA binding protein 3                                                                                 |
| 229394_s_at | 0.00081  | 0.6 | GRLF1        | Glucocorticoid receptor DNA binding factor 1                                                           |
| 201209_at   | 2.56E-06 | 0.5 | HDAC1        | histone deacetylase 1                                                                                  |
| 214438_at   | 0.00806  | 2.6 | HLX1         | H2.0-like homeo box 1 (Drosophila)                                                                     |
| 205070_at   | 0.000339 | 0.6 | ING3         | inhibitor of growth family, member 3                                                                   |
| 55872_at    | 0.00123  | 0.5 | KIAA1196     | KIAA1196 protein                                                                                       |
| 210504_at   | 1.30E-06 | 6.7 | KLF1         | Kruppel-like factor 1 (erythroid)                                                                      |
| 227198_at   | 0.00393  | 0.4 | LAF4         | Lymphoid nuclear protein related to AF4                                                                |
| 226275_at   | 0.000339 | 2.6 | MAD          | MAX dimerization protein 1                                                                             |



|             |          |      |         |                                                                                                 |
|-------------|----------|------|---------|-------------------------------------------------------------------------------------------------|
| 228846_at   | 0.000133 | 3.4  | MAD     | MAX dimerization protein 1                                                                      |
| 218438_s_at | 0.000214 | 0.6  | MED28   | mediator of RNA polymerase II transcription, subunit 28 homolog                                 |
| 225159_s_at | 0.00183  | 0.7  | MED28   | Mediator of RNA polymerase II transcription, subunit 28 homolog (yeast)                         |
| 238761_at   | 8.96E-06 | 0.4  | MED28   | Mediator of RNA polymerase II transcription, subunit 28 homolog (yeast)                         |
| 217843_s_at | 0.00806  | 0.6  | MED4    | mediator of RNA polymerase II transcription, subunit 4 homolog (yeast)                          |
| 218259_at   | 0.00566  | 0.6  | MKL2    | MKL/myocardin-like 2                                                                            |
| 223189_x_at | 4.82E-05 | 0.5  | MLL5    | myeloid/lymphoid or mixed-lineage leukemia 5 (trithorax homolog, Drosophila)                    |
| 223190_s_at | 0.00566  | 0.5  | MLL5    | myeloid/lymphoid or mixed-lineage leukemia 5 (trithorax homolog, Drosophila)                    |
| 226100_at   | 0.00806  | 0.5  | MLL5    | myeloid/lymphoid or mixed-lineage leukemia 5 (trithorax homolog, Drosophila)                    |
| 202364_at   | 1.30E-06 | 5.8  | MXI1    | MAX interactor 1                                                                                |
| 209930_s_at | 1.30E-06 | 6.4  | NFE2    | nuclear factor (erythroid-derived 2), 45kDa                                                     |
| 225768_at   | 0.000339 | 0.6  | NR1D2   | nuclear receptor subfamily 1, group D, member 2                                                 |
| 228569_at   | 2.82E-05 | 0.6  | PAPOLA  | poly(A) polymerase alpha                                                                        |
| 239210_at   | 0.00123  | 4.3  | PBX1    | Pre-B-cell leukemia transcription factor 1                                                      |
| 212259_s_at | 0.000528 | 0.5  | PBXIP1  | pre-B-cell leukemia transcription factor interacting protein 1                                  |
| 214177_s_at | 1.61E-05 | 0.6  | PBXIP1  | pre-B-cell leukemia transcription factor interacting protein 1                                  |
| 212660_at   | 0.00393  | 0.6  | PHF15   | PHD finger protein 15                                                                           |
| 209422_at   | 8.96E-06 | 0.5  | PHF20   | PHD finger protein 20                                                                           |
| 217952_x_at | 4.86E-06 | 0.7  | PHF3    | PHD finger protein 3                                                                            |
| 217864_s_at | 1.61E-05 | 0.6  | PIAS1   | protein inhibitor of activated STAT, 1                                                          |
| 204839_at   | 0.0027   | 0.7  | POP5    | processing of precursor 5, ribonuclease P/MRP subunit (S. cerevisiae)                           |
| 203497_at   | 0.000528 | 0.5  | PPARBP  | PPAR binding protein                                                                            |
| 232517_s_at | 1.61E-05 | 2.9  | PRIC285 | peroxisomal proliferator-activated receptor A interacting complex 285                           |
| 212332_at   | 0.00566  | 0.5  | RBL2    | retinoblastoma-like 2 (p130)                                                                    |
| 219286_s_at | 0.00183  | 0.6  | RBM15   | RNA binding motif protein 15                                                                    |
| 204633_s_at | 0.000339 | 0.6  | RPS6KA5 | ribosomal protein S6 kinase, 90kDa, polypeptide 5                                               |
| 222514_at   | 0.000994 | 1.4  | RRAGC   | Ras-related GTP binding C                                                                       |
| 202426_s_at | 0.0027   | 3.0  | RXRA    | retinoid X receptor, alpha                                                                      |
| 208740_at   | 4.82E-05 | 0.5  | SAP18   | sin3-associated polypeptide, 18kDa                                                              |
| 203408_s_at | 0.00123  | 0.7  | SATB1   | special AT-rich sequence binding protein 1 (binds to nuclear matrix/scaffold-associating DNA's) |
| 203077_s_at | 0.00269  | 0.7  | SMAD2   | SMAD, mothers against DPP homolog 2 (Drosophila)                                                |
| 235725_at   | 0.000339 | 0.6  | SMAD4   | SMAD, mothers against DPP homolog 4 (Drosophila)                                                |
| 201417_at   | 8.96E-06 | 0.5  | SOX4    | SRY (sex determining region Y)-box 4                                                            |
| 201139_s_at | 0.000214 | 0.6  | SSB     | Sjogren syndrome antigen B (autoantigen La)                                                     |
| 203787_at   | 0.00183  | 0.6  | SSBP2   | single-stranded DNA binding protein 2                                                           |
| 209358_at   | 0.00392  | 0.6  | TAF11   | TAF11 RNA polymerase II, TATA box binding protein (TBP)-associated factor, 28kDa                |
| 216925_s_at | 1.30E-06 | 17.2 | TAL1    | T-cell acute lymphocytic leukemia 1                                                             |
| 203753_at   | 0.00806  | 0.5  | TCF4    | Transcription factor 4                                                                          |
| 213891_s_at | 0.00566  | 0.5  | TCF4    | Transcription factor 4                                                                          |
| 205255_x_at | 0.000214 | 0.6  | TCF7    | Transcription factor 7 (T-cell specific, HMG-box)                                               |
| 206649_s_at | 0.0027   | 1.9  | TFE3    | Transcription factor binding to IGHM enhancer 3                                                 |
| 206472_s_at | 0.000214 | 2.0  | TLE3    | transducin-like enhancer of split 3 (E(sp1) homolog, Drosophila)                                |
| 217501_at   | 0.000528 | 0.5  | WDR39   | WD repeat domain 39                                                                             |
| 202979_s_at | 0.00566  | 0.6  | ZF      | HCF-binding transcription factor Zhangfei                                                       |
| 227796_at   | 0.00123  | 0.6  | ZFP62   | zinc finger protein 62 homolog (mouse)                                                          |
| 225221_at   | 0.00183  | 0.5  | ZKSCAN1 | Zinc finger with KRAB and SCAN domains 1                                                        |

|                                 |          |       |           |                                                                                        |
|---------------------------------|----------|-------|-----------|----------------------------------------------------------------------------------------|
| 202136_at                       | 0.00806  | 0.7   | ZMYND11   | zinc finger, MYND domain containing 11                                                 |
| 219571_s_at                     | 0.0027   | 0.5   | ZNF12     | zinc finger protein 12 (KOX 30)                                                        |
| 221873_at                       | 8.07E-05 | 0.6   | ZNF143    | zinc finger protein 143 (clone pHZ-1)                                                  |
| 214686_at                       | 0.00123  | 0.6   | ZNF266    | zinc finger protein 266                                                                |
| 218490_s_at                     | 0.00806  | 0.5   | ZNF302    | zinc finger protein 302                                                                |
| 228392_at                       | 0.00123  | 0.5   | ZNF302    | Zinc finger protein 302                                                                |
| 215359_x_at                     | 0.00393  | 0.6   | ZNF44     | zinc finger protein 44 (KOX 7)                                                         |
| 228138_at                       | 0.000214 | 0.7   | ZNF498    | zinc finger protein 498                                                                |
| 223392_s_at                     | 0.00393  | 1.8   | ZNF537    | zinc finger protein 537                                                                |
| 218735_s_at                     | 0.00806  | 0.7   | ZNF544    | zinc finger protein 544                                                                |
| 211721_s_at                     | 0.00183  | 0.6   | ZNF551    | zinc finger protein 551                                                                |
| 224518_s_at                     | 0.00081  | 0.5   | ZNF559    | zinc finger protein 559                                                                |
| 208137_x_at                     | 2.82E-05 | 0.5   | ZNF611    | zinc finger protein 611                                                                |
| 205089_at                       | 0.00806  | 0.6   | ZNF7      | zinc finger protein 7 (KOX 4, clone HF.16)                                             |
| 221645_s_at                     | 0.00393  | 0.5   | ZNF83     | zinc finger protein 83 (HPF1)                                                          |
| 206158_s_at                     | 0.00123  | 0.7   | ZNF9      | zinc finger protein 9                                                                  |
| 235170_at                       | 0.00566  | 0.6   | ZNF92     | zinc finger protein 92 (HTF12)                                                         |
| <b>Extracellular matrix</b>     |          |       |           |                                                                                        |
| 209840_s_at                     | 0.000133 | 0.3   | LRRN3     | leucine rich repeat neuronal 3                                                         |
| 209841_s_at                     | 0.000339 | 0.3   | LRRN3     | leucine rich repeat neuronal 3                                                         |
| 203936_s_at                     | 0.000214 | 13.3  | MMP9      | matrix metalloproteinase 9 (gelatinase B, 92kDa gelatinase, 92kDa type IV collagenase) |
| 202524_s_at                     | 1.61E-05 | 0.6   | SPOCK2    | sparc/osteonectin, cwcv and kazal-like domains proteoglycan (testican) 2               |
| <b>cytoskeleton/microtubule</b> |          |       |           |                                                                                        |
| 218395_at                       | 0.00393  | 0.7   | ACTR6     | ARP6 actin-related protein 6 homolog (yeast)                                           |
| 201753_s_at                     | 0.00183  | 0.6   | ADD3      | adducin 3 (gamma)                                                                      |
| 205882_x_at                     | 0.00393  | 0.7   | ADD3      | adducin 3 (gamma)                                                                      |
| 205389_s_at                     | 1.61E-05 | 5.7   | ANK1      | ankyrin 1, erythrocytic                                                                |
| 208353_x_at                     | 0.00123  | 5.8   | ANK1      | ankyrin 1, erythrocytic                                                                |
| 202391_at                       | 0.000133 | 3.2   | BASP1     | brain abundant, membrane attached signal protein 1                                     |
| 208451_s_at                     | 0.000528 | 6.8   | C4A       | complement component 4A                                                                |
| 201605_x_at                     | 0.00081  | 1.7   | CNN2      | calponin 2                                                                             |
| 218660_at                       | 1.30E-06 | 4.4   | DYSF*     | dysferlin, limb girdle muscular dystrophy 2B (autosomal recessive)                     |
| 210746_s_at                     | 1.30E-06 | 142.5 | EPB42     | erythrocyte membrane protein band 4.2                                                  |
| 204505_s_at                     | 1.30E-06 | 11.5  | EPB49*    | erythrocyte membrane protein band 4.9 (dematin)                                        |
| 207721_x_at                     | 1.30E-06 | 0.6   | HINT1*    | histidine triad nucleotide binding protein 1                                           |
| 212878_s_at                     | 1.30E-06 | 0.6   | KNS2*     | kinesin 2 60/70kDa                                                                     |
| 205900_at                       | 4.82E-05 | 19.9  | KRT1      | keratin 1 (epidermolytic hyperkeratosis)                                               |
| 232011_s_at                     | 1.29E-06 | 2.3   | MAP1LC3A* | Microtubule-associated protein 1 light chain 3 alpha                                   |
| 210088_x_at                     | 1.30E-06 | 9.9   | MYL4      | myosin, light polypeptide 4, alkali; atrial, embryonic                                 |
| 216054_x_at                     | 1.30E-06 | 10.2  | MYL4      | myosin, light polypeptide 4, alkali; atrial, embryonic                                 |
| 217274_x_at                     | 2.56E-06 | 5.7   | MYL4      | myosin, light polypeptide 4, alkali; atrial, embryonic                                 |
| 210395_x_at                     | 1.30E-06 | 11.6  | MYL4*     | myosin, light polypeptide 4, alkali; atrial, embryonic                                 |
| 226335_at                       | 0.00123  | 0.7   | RPS6KA3   | ribosomal protein S6 kinase, 90kDa, polypeptide 3                                      |
| 201060_x_at                     | 4.82E-05 | 3.6   | STOM      | Stomatin                                                                               |
| 201061_s_at                     | 8.07E-05 | 2.7   | STOM      | Stomatin                                                                               |
| 203662_s_at                     | 1.30E-06 | 29.8  | TMOD1     | tropomodulin 1                                                                         |
| 203661_s_at                     | 1.30E-06 | 9.9   | TMOD1*    | tropomodulin 1                                                                         |
| 210987_x_at                     | 0.00183  | 2.8   | TPM1      | Tropomyosin 1 (alpha)                                                                  |
| 212481_s_at                     | 0.00183  | 1.7   | TPM4      | Tropomyosin 4                                                                          |

|                                   |          |      |           |                                                                                               |
|-----------------------------------|----------|------|-----------|-----------------------------------------------------------------------------------------------|
| 219351_at                         | 2.82E-05 | 0.6  | TRAPPC2   | trafficking protein particle complex 2                                                        |
| 209251_x_at                       | 0.00183  | 1.4  | TUBA6     | tubulin alpha 6                                                                               |
| 210389_x_at                       | 0.00393  | 0.7  | TUBD1     | tubulin, delta 1                                                                              |
| 208623_s_at                       | 0.000339 | 0.5  | VIL2      | villin 2 (ezrin)                                                                              |
| <b>G-protein coupled receptor</b> |          |      |           |                                                                                               |
| 218030_at                         | 1.30E-06 | 3.8  | GIT1*     | G protein-coupled receptor kinase interactor 1                                                |
| 204000_at                         | 8.96E-06 | 0.6  | GNB5      | guanine nucleotide binding protein (G protein), beta 5                                        |
| 228770_at                         | 2.82E-05 | 9.8  | GPR146    | G protein-coupled receptor 146                                                                |
| 212090_at                         | 0.000133 | 2.9  | GRINA     | glutamate receptor, ionotropic, N-methyl D-aspartate-associated protein 1 (glutamate binding) |
| 233657_at                         | 0.00123  | 1.9  | OPN5      | opsin 5                                                                                       |
| 224707_at                         | 4.86E-06 | 5.1  | ORF1-FL49 | putative nuclear protein ORF1-FL49                                                            |
| 201042_at                         | 4.86E-06 | 5.0  | TGM2      | transglutaminase 2 (C polypeptide, protein-glutamine-gamma-glutamyltransferase)               |
| <b>Signal transduction</b>        |          |      |           |                                                                                               |
| 202096_s_at                       | 0.000528 | 1.9  | BZRP      | benzodiazapine receptor (peripheral)                                                          |
| 208826_x_at                       | 4.82E-05 | 0.7  | HINT1     | histidine triad nucleotide binding protein 1                                                  |
| 227087_at                         | 0.00183  | 0.5  | INPP4A    | Inositol polyphosphate-4-phosphatase, type I, 107kDa                                          |
| 202974_at                         | 1.30E-06 | 7.5  | MPP1      | membrane protein, palmitoylated 1, 55kDa                                                      |
| 219607_s_at                       | 4.82E-05 | 6.6  | MS4A4A    | membrane-spanning 4-domains, subfamily A, member 4                                            |
| 222317_at                         | 0.00803  | 0.5  | PDE3B     | Phosphodiesterase 3B, cGMP-inhibited                                                          |
| 223358_s_at                       | 0.00081  | 0.6  | PDE7A     | Phosphodiesterase 7A                                                                          |
| 201877_s_at                       | 0.00566  | 0.7  | PPP2R5C   | protein phosphatase 2, regulatory subunit B (B56), gamma isoform                              |
| 229322_at                         | 0.00566  | 0.7  | PPP2R5E   | protein phosphatase 2, regulatory subunit B (B56), epsilon isoform                            |
| <b>Regulation translation</b>     |          |      |           |                                                                                               |
| 209861_s_at                       | 0.000528 | 0.6  | METAP2    | methionyl aminopeptidase 2                                                                    |
| 244185_at                         | 0.00806  | 0.5  | METAP2    | Methionyl aminopeptidase 2                                                                    |
| 218205_s_at                       | 0.00566  | 0.6  | MKNK2     | MAP kinase interacting serine/threonine kinase 2                                              |
| <b>Cell cycle</b>                 |          |      |           |                                                                                               |
| 201458_s_at                       | 0.00081  | 0.6  | BUB3      | BUB3 budding uninhibited by benzimidazoles 3 homolog (yeast)                                  |
| 208796_s_at                       | 0.00806  | 0.7  | CCNG1     | cyclin G1                                                                                     |
| 232266_x_at                       | 0.00123  | 0.4  | CDC2L5    | Cell division cycle 2-like 5 (cholinesterase-related cell division controller)                |
| 209112_at                         | 8.96E-06 | 0.6  | CDKN1B    | cyclin-dependent kinase inhibitor 1B (p27, Kip1)                                              |
| 2028_s_at                         | 0.00566  | 1.8  | E2F1      | E2F transcription factor 1                                                                    |
| 228361_at                         | 2.82E-05 | 3.8  | E2F2      | E2F transcription factor 2                                                                    |
| 201912_s_at                       | 1.30E-06 | 6.3  | GSPT1     | G1 to S phase transition 1                                                                    |
| 215438_x_at                       | 4.82E-05 | 6.3  | GSPT1     | G1 to S phase transition 1                                                                    |
| 211040_x_at                       | 0.000133 | 2.0  | GTSE1     | G-2 and S-phase expressed 1                                                                   |
| 210212_x_at                       | 0.00566  | 0.8  | MTCP1     | mature T-cell proliferation 1                                                                 |
| 200658_s_at                       | 0.000214 | 0.5  | PHB       | Prohibitin                                                                                    |
| 238656_at                         | 0.0027   | 0.6  | RAD50     | RAD50 homolog (S. cerevisiae)                                                                 |
| 212783_at                         | 0.0027   | 0.5  | RBBP6     | retinoblastoma binding protein 6                                                              |
| 203175_at                         | 4.82E-05 | 1.9  | RHOG      | ras homolog gene family, member G (rho G)                                                     |
| 235683_at                         | 1.29E-06 | 19.6 | SESN3*    | sestrin 3                                                                                     |
| 235684_s_at                       | 4.86E-06 | 7.6  | SESN3     | sestrin 3                                                                                     |
| 210567_s_at                       | 0.00081  | 0.7  | SKP2      | S-phase kinase-associated protein 2 (p45)                                                     |
| 212330_at                         | 1.61E-05 | 2.9  | TFDP1     | Transcription factor Dp-1                                                                     |
| 222243_s_at                       | 0.00081  | 0.5  | TOB2      | transducer of ERBB2, 2                                                                        |
| <b>NF-kB</b>                      |          |      |           |                                                                                               |
| 203113_s_at                       | 1.30E-06 | 0.2  | EEF1D*    | eukaryotic translation elongation factor 1 delta (guanine nucleotide exchange protein)        |
| <b>protein biosynthesis</b>       |          |      |           |                                                                                               |



|             |          |     |          |                                                                    |
|-------------|----------|-----|----------|--------------------------------------------------------------------|
| 204905_s_at | 0.0027   | 0.6 | EEF1E1   | eukaryotic translation elongation factor 1 epsilon 1               |
| 210501_x_at | 0.00806  | 0.7 | EIF3S12  | eukaryotic translation initiation factor 3, subunit 12             |
| 221494_x_at | 0.00393  | 0.7 | EIF3S12  | eukaryotic translation initiation factor 3, subunit 12             |
| 201592_at   | 0.0027   | 0.7 | EIF3S3   | eukaryotic translation initiation factor 3, subunit 3 gamma, 40kDa |
| 208887_at   | 0.000528 | 0.6 | EIF3S4   | eukaryotic translation initiation factor 3, subunit 4 delta, 44kDa |
| 212904_at   | 4.82E-05 | 0.7 | KIAA1185 | KIAA1185 protein                                                   |
| 226588_at   | 0.00123  | 0.4 | KIAA1604 | KIAA1604 protein                                                   |
| 222064_s_at | 8.96E-06 | 0.7 | MGC2744  | Hypothetical protein MGC2744                                       |
| 224479_s_at | 2.56E-06 | 0.7 | MRPL45   | mitochondrial ribosomal protein L45                                |
| 217408_at   | 0.00806  | 0.6 | MRPS18B  | mitochondrial ribosomal protein S18B                               |
| 225477_s_at | 0.00393  | 0.6 | MRPS25   | Mitochondrial ribosomal protein S25                                |
| 200735_x_at | 0.00081  | 0.6 | NACA     | nascent-polypeptide-associated complex alpha polypeptide           |
| 200036_s_at | 0.00393  | 0.7 | RPL10A   | ribosomal protein L10a                                             |
| 213588_x_at | 0.000339 | 0.6 | RPL14    | ribosomal protein L14                                              |
| 200074_s_at | 0.00806  | 0.7 | RPL14    | ribosomal protein L14                                              |
| 217266_at   | 0.0027   | 0.6 | RPL15    | ribosomal protein L15                                              |
| 221475_s_at | 0.000528 | 0.7 | RPL15    | ribosomal protein L15                                              |
| 221476_s_at | 2.56E-06 | 0.7 | RPL15    | ribosomal protein L15                                              |
| 216383_at   | 0.00806  | 0.4 | RPL18A   | ribosomal protein L18a                                             |
| 214042_s_at | 1.30E-06 | 0.7 | RPL22    | ribosomal protein L22                                              |
| 221726_at   | 1.61E-05 | 0.7 | RPL22    | ribosomal protein L22                                              |
| 200823_x_at | 0.000339 | 0.6 | RPL29    | ribosomal protein L29                                              |
| 200002_at   | 0.00123  | 0.6 | RPL35    | ribosomal protein L35                                              |
| 200089_s_at | 4.86E-06 | 0.6 | RPL4     | ribosomal protein L4                                               |
| 201154_x_at | 8.07E-05 | 0.7 | RPL4     | ribosomal protein L4                                               |
| 200937_s_at | 8.96E-06 | 0.7 | RPL5     | ribosomal protein L5                                               |
| 208646_at   | 1.30E-06 | 0.4 | RPS14*   | ribosomal protein S14                                              |
| 218007_s_at | 0.000528 | 0.6 | RPS27L   | ribosomal protein S27-like                                         |
| 200082_s_at | 0.00123  | 0.7 | RPS7     | ribosomal protein S7                                               |
| 200858_s_at | 0.00081  | 0.7 | RPS8     | ribosomal protein S8                                               |
| 214317_x_at | 0.00393  | 0.5 | RPS9     | ribosomal protein S9                                               |
| 212018_s_at | 4.86E-06 | 0.5 | RSL1D1   | ribosomal L1 domain containing 1                                   |
| 200802_at   | 4.82E-05 | 0.8 | SARS     | seryl-tRNA synthetase                                              |
| 202614_at   | 0.00806  | 0.7 | SLC30A9  | solute carrier family 30 (zinc transporter), member 9              |
| 201922_at   | 0.0027   | 0.6 | TINP1    | TGF beta-inducible nuclear protein 1                               |
| 204703_at   | 0.00182  | 0.7 | TTC10    | tetratricopeptide repeat domain 10                                 |
| 206621_s_at | 0.00183  | 0.7 | WBSCR1   | Williams-Beuren syndrome chromosome region 1                       |

### protein amino acid phosphorylation

|             |          |      |          |                                                                           |
|-------------|----------|------|----------|---------------------------------------------------------------------------|
| 223266_at   | 1.30E-06 | 13.9 | ALS2CR2* | amyotrophic lateral sclerosis 2 (juvenile) chromosome region, candidate 2 |
| 59644_at    | 0.00325  | 2.1  | BMP2K    | BMP2 inducible kinase                                                     |
| 203468_at   | 1.61E-05 | 0.3  | CDK10    | cyclin-dependent kinase (CDC2-like) 10                                    |
| 227767_at   | 0.000339 | 0.6  | CSNK1G3  | Casein kinase 1, gamma 3                                                  |
| 213980_s_at | 4.82E-05 | 0.4  | CTBP1    | C-terminal binding protein 1                                              |
| 208018_s_at | 0.0027   | 1.5  | HCK      | Hemopoietic cell kinase                                                   |
| 201234_at   | 0.00081  | 1.6  | ILK      | integrin-linked kinase                                                    |
| 227677_at   | 0.00393  | 1.7  | JAK3     | Janus kinase 3 (a protein tyrosine kinase, leukocyte)                     |
| 204155_s_at | 4.82E-05 | 0.5  | KIAA0999 | KIAA0999 protein                                                          |
| 202193_at   | 0.0027   | 2.6  | LIMK2    | LIM domain kinase 2                                                       |
| 210582_s_at | 0.00183  | 2.6  | LIMK2    | LIM domain kinase 2                                                       |
| 207667_s_at | 8.96E-06 | 4.5  | MAP2K3   | mitogen-activated protein kinase kinase 3                                 |

|             |          |     |        |                                              |
|-------------|----------|-----|--------|----------------------------------------------|
| 215498_s_at | 0.000339 | 4.4 | MAP2K3 | mitogen-activated protein kinase kinase 3    |
| 215499_at   | 0.0027   | 4.3 | MAP2K3 | Mitogen-activated protein kinase kinase 3    |
| 202530_at   | 8.07E-05 | 2.0 | MAPK14 | mitogen-activated protein kinase 14          |
| 202568_s_at | 2.82E-05 | 2.4 | MARK3  | MAP/microtubule affinity-regulating kinase 3 |
| 218499_at   | 0.000528 | 0.6 | MST4   | Mst3 and SOK1-related kinase                 |
| 41329_at    | 0.00081  | 0.6 | PACE-1 | ezrin-binding partner PACE-1                 |
| 208875_s_at | 4.82E-05 | 1.5 | PAK2   | p21 (CDKN1A)-activated kinase 2              |
| 209018_s_at | 4.86E-06 | 3.0 | PINK1  | PTEN induced putative kinase 1               |
| 218764_at   | 4.86E-06 | 0.5 | PRKCH  | protein kinase C, eta                        |
| 202129_s_at | 4.82E-05 | 5.9 | RIOK3  | RIO kinase 3 (yeast)                         |
| 202130_at   | 0.00393  | 3.8 | RIOK3  | RIO kinase 3 (yeast)                         |
| 202131_s_at | 0.00081  | 3.3 | RIOK3  | RIO kinase 3 (yeast)                         |
| 209481_at   | 0.00081  | 0.7 | SNRK   | SNF-1 related kinase                         |
| 204062_s_at | 0.00393  | 0.7 | ULK2   | unc-51-like kinase 2 (C. elegans)            |

### Apoptosis

|             |          |      |         |                                                               |
|-------------|----------|------|---------|---------------------------------------------------------------|
| 202512_s_at | 0.00393  | 0.6  | APG5L   | APG5 autophagy 5-like (S. cerevisiae)                         |
| 202387_at   | 8.96E-06 | 4.6  | BAG1    | BCL2-associated athanogene                                    |
| 211475_s_at | 1.30E-06 | 3.7  | BAG1*   | BCL2-associated athanogene                                    |
| 202985_s_at | 0.00183  | 0.7  | BAG5    | BCL2-associated athanogene 5                                  |
| 206665_s_at | 2.82E-05 | 17.7 | BCL2L1  | BCL2-like 1                                                   |
| 212312_at   | 1.30E-06 | 9.5  | BCL2L1* | BCL2-like 1                                                   |
| 215037_s_at | 1.30E-06 | 6.4  | BCL2L1* | BCL2-like 1                                                   |
| 204861_s_at | 0.00806  | 2.0  | BIRC1   | baculoviral IAP repeat-containing 1                           |
| 221479_s_at | 0.000214 | 6.1  | BNIP3L  | BCL2/adenovirus E1B 19kDa interacting protein 3-like          |
| 200920_s_at | 0.00123  | 0.6  | BTG1    | B-cell translocation gene 1, anti-proliferative               |
| 213581_at   | 4.82E-05 | 0.6  | PDCD2   | programmed cell death 2                                       |
| 212594_at   | 2.82E-05 | 0.5  | PDCD4   | programmed cell death 4 (neoplastic transformation inhibitor) |
| 200608_s_at | 0.0027   | 0.7  | RAD21   | RAD21 homolog (S. pombe)                                      |
| 211509_s_at | 0.00183  | 1.4  | RTN4    | reticulon 4                                                   |
| 204466_s_at | 1.30E-06 | 28.0 | SNCA*   | synuclein, alpha (non A4 component of amyloid precursor)      |
| 204467_s_at | 1.30E-06 | 30.9 | SNCA    | synuclein, alpha (non A4 component of amyloid precursor)      |
| 207827_x_at | 1.30E-06 | 16.7 | SNCA*   | synuclein, alpha (non A4 component of amyloid precursor)      |
| 211546_x_at | 1.30E-06 | 13.4 | SNCA*   | synuclein, alpha (non A4 component of amyloid precursor)      |
| 200803_s_at | 0.00806  | 1.4  | TEGT    | testis enhanced gene transcript (BAX inhibitor 1)             |
| 221602_s_at | 0.0027   | 0.5  | TOSO    | regulator of Fas-induced apoptosis                            |

### proteolysis and peptidolysis

|             |          |      |       |                                                                 |
|-------------|----------|------|-------|-----------------------------------------------------------------|
| 200839_s_at | 4.86E-06 | 2.4  | CTSB  | cathepsin B                                                     |
| 213274_s_at | 4.82E-05 | 2.2  | CTSB  | cathepsin B                                                     |
| 201945_at   | 0.000339 | 2.2  | FURIN | furin (paired basic amino acid cleaving enzyme)                 |
| 207460_at   | 1.30E-06 | 0.4  | GZMM  | granzyme M (lymphocyte met-ase 1)                               |
| 206697_s_at | 2.56E-06 | 5.4  | HP    | Haptoglobin                                                     |
| 208470_s_at | 0.00393  | 13.9 | HP    | Haptoglobin                                                     |
| 210017_at   | 4.82E-05 | 0.5  | MALT1 | mucosa associated lymphoid tissue lymphoma translocation gene 1 |
| 210018_x_at | 0.00123  | 0.6  | MALT1 | mucosa associated lymphoid tissue lymphoma translocation gene 1 |
| 207890_s_at | 0.000214 | 2.7  | MMP25 | matrix metalloproteinase 25                                     |
| 208709_s_at | 0.00123  | 1.5  | NRD1  | nardilysin (N-arginine dibasic convertase)                      |
| 200661_at   | 8.07E-05 | 1.7  | PPGB  | protective protein for beta-galactosidase (galactosialidosis)   |

### cell growth

|             |          |     |       |                                    |
|-------------|----------|-----|-------|------------------------------------|
| 221675_s_at | 4.86E-06 | 5.6 | CHPT1 | choline phosphotransferase 1       |
| 206359_at   | 0.00123  | 4.7 | SOCS3 | suppressor of cytokine signaling 3 |

|                                        |          |      |                    |                                                             |
|----------------------------------------|----------|------|--------------------|-------------------------------------------------------------|
| 227697_at                              | 0.000339 | 5.5  | SOCS3              | suppressor of cytokine signaling 3                          |
| 201758_at                              | 2.56E-06 | 1.7  | TSG101             | tumor susceptibility gene 101                               |
| <b>protein folding</b>                 |          |      |                    |                                                             |
| 218168_s_at                            | 0.00806  | 0.7  | CABC1              | chaperone, ABC1 activity of bc1 complex like (S. pombe)     |
| 209275_s_at                            | 0.00393  | 1.7  | CLN3               | ceroid-lipofuscinosis, neuronal 3, juvenile                 |
| 228622_s_at                            | 0.00393  | 0.7  | DNAJC4             | DnaJ (Hsp40) homolog, subfamily C, member 4                 |
| 219672_at                              | 1.30E-06 | 30.0 | ERAF               | erythroid associated factor                                 |
| 229949_at                              | 0.00123  | 0.6  | FKBP6              | FK506 binding protein 6, 36kDa                              |
| 40850_at                               | 1.30E-06 | 48.4 | FKBP8*             | FK506 binding protein 8, 38kDa                              |
| 205361_s_at                            | 0.00183  | 0.6  | PFDN4              | prefoldin 4                                                 |
| 201759_at                              | 0.00806  | 2.2  | TBCD               | tubulin-specific chaperone d                                |
| <b>RNA Binding</b>                     |          |      |                    |                                                             |
| 200810_s_at                            | 8.96E-06 | 0.5  | CIRBP              | cold inducible RNA binding protein                          |
| 200811_at                              | 0.00806  | 0.6  | CIRBP              | cold inducible RNA binding protein                          |
| 211938_at                              | 8.96E-06 | 0.6  | EIF4B              | eukaryotic translation initiation factor 4B                 |
| 214280_x_at                            | 0.00393  | 0.6  | HNRPA1             | heterogeneous nuclear ribonucleoprotein A1                  |
| 201993_x_at                            | 1.30E-06 | 0.6  | HNRPDL             | heterogeneous nuclear ribonucleoprotein D-like              |
| 209067_s_at                            | 1.61E-05 | 0.5  | HNRPDL             | heterogeneous nuclear ribonucleoprotein D-like              |
| 209068_at                              | 1.30E-06 | 0.5  | HNRPDL             | heterogeneous nuclear ribonucleoprotein D-like              |
| 225394_s_at                            | 0.00566  | 0.6  | MADP-1             | MADP-1 protein                                              |
| 210093_s_at                            | 1.61E-05 | 0.3  | MAGOH              | mago-nashi homolog, proliferation-associated (Drosophila)   |
| 225326_at                              | 2.82E-05 | 0.7  | RBM27              | RNA binding motif protein 27                                |
| 229903_x_at                            | 2.82E-05 | 0.6  | RNP                | U11/U12 snRNP 65K                                           |
| 203818_s_at                            | 8.96E-06 | 0.7  | SF3A3              | splicing factor 3a, subunit 3, 60kDa                        |
| 214305_s_at                            | 0.00806  | 0.4  | SF3B1              | splicing factor 3b, subunit 1, 155kDa                       |
| 203380_x_at                            | 0.000339 | 0.7  | SFRS5              | splicing factor, arginine/serine-rich 5                     |
| 217833_at                              | 2.82E-05 | 0.7  | SYNCRIP            | Synaptotagmin binding, cytoplasmic RNA interacting protein  |
| <b>intracellular signaling cascade</b> |          |      |                    |                                                             |
| 209409_at                              | 0.00392  | 2.1  | GRB10              | growth factor receptor-bound protein 10                     |
| 212873_at                              | 0.00566  | 0.7  | HA-1               | minor histocompatibility antigen HA-1                       |
| 206302_s_at                            | 8.07E-05 | 6.6  | NUDT4              | nudix (nucleoside diphosphate linked moiety X)-type motif 4 |
| 206303_s_at                            | 4.86E-06 | 7.2  | NUDT4              | nudix (nucleoside diphosphate linked moiety X)-type motif 4 |
| 212239_at                              | 0.00123  | 0.5  | PIK3R1             | phosphoinositide-3-kinase, regulatory subunit 1 (p85 alpha) |
| 229980_s_at                            | 0.000133 | 0.4  | SNX5               | sorting nexin 5                                             |
| 221748_s_at                            | 1.30E-06 | 12.4 | TNS                | tensin                                                      |
| 226255_at                              | 0.000528 | 0.7  | ZBTB33             | zinc finger and BTB domain containing 33                    |
| <b>RNA processing</b>                  |          |      |                    |                                                             |
| 211623_s_at                            | 0.000214 | 0.6  | FBL                | fibrillarin                                                 |
| 201054_at                              | 0.000339 | 0.7  | HNRPA0             | heterogeneous nuclear ribonucleoprotein A0                  |
| 232004_at                              | 8.07E-05 | 0.6  | HNRPR              | Heterogeneous nuclear ribonucleoprotein R                   |
| 201517_at                              | 4.82E-05 | 0.6  | NCBP2              | nuclear cap binding protein subunit 2, 20kDa                |
| 208319_s_at                            | 0.00806  | 0.5  | RBM3               | RNA binding motif (RNP1, RRM) protein 3                     |
| 206111_at                              | 8.96E-06 | 4.0  | RNASE2             | ribonuclease, RNase A family, 2                             |
| 228370_at                              | 2.82E-05 | 0.6  | SNRPN              | SNRPN upstream reading frame                                |
| 201522_x_at                            | 0.000339 | 0.7  | SNRPN ///<br>SNURF | small nuclear ribonucleoprotein polypeptide N               |
| 206042_x_at                            | 2.82E-05 | 0.7  | SNRPN ///<br>SNURF | small nuclear ribonucleoprotein polypeptide N               |
| <b>ribosome biogenesis</b>             |          |      |                    |                                                             |
| 203082_at                              | 0.0027   | 0.7  | BMS1L              | BMS1-like, ribosome assembly protein (yeast)                |
| 201948_at                              | 0.000133 | 0.6  | GNL2               | guanine nucleotide binding protein-like 2 (nucleolar)       |

| Protein modification    |          |       |           |                                                                                                   |
|-------------------------|----------|-------|-----------|---------------------------------------------------------------------------------------------------|
| 212406_s_at             | 0.0027   | 0.7   | C20orf36  | chromosome 20 open reading frame 36                                                               |
| 209391_at               | 0.00123  | 2.0   | DPM2      | dolichyl-phosphate mannosyltransferase polypeptide 2, regulatory subunit                          |
| 203367_at               | 0.00803  | 0.7   | DUSP14    | dual specificity phosphatase 14                                                                   |
| 226119_at               | 0.00806  | 0.6   | LOC115294 | similar to hypothetical protein FLJ10883                                                          |
| 202197_at               | 0.0027   | 1.7   | MTMR3     | myotubularin related protein 3                                                                    |
| 205005_s_at             | 4.86E-06 | 0.5   | NMT2      | N-myristoyltransferase 2                                                                          |
| 203966_s_at             | 0.00081  | 4.6   | PPM1A     | protein phosphatase 1A (formerly 2C), magnesium-dependent, alpha isoform                          |
| 208615_s_at             | 4.82E-05 | 0.5   | PTP4A2    | protein tyrosine phosphatase type IVA, member 2                                                   |
| 209180_at               | 0.00393  | 0.6   | RABGGTB   | Rab geranylgeranyltransferase, beta subunit                                                       |
| 217977_at               | 0.000133 | 2.4   | SEPX1     | selenoprotein X, 1                                                                                |
| 222989_s_at             | 0.00081  | 2.2   | UBQLN1    | ubiquilin 1                                                                                       |
| DNA/Nucleosome assembly |          |       |           |                                                                                                   |
| 212672_at               | 0.000339 | 0.5   | ATM       | Ataxia telangiectasia mutated (includes complementation groups A, C and D)                        |
| 218877_s_at             | 0.00123  | 0.5   | C6orf75   | chromosome 6 open reading frame 75                                                                |
| 223518_at               | 4.86E-06 | 1.9   | DFFA      | DNA fragmentation factor, 45kDa, alpha polypeptide                                                |
| 228131_at               | 0.000339 | 0.6   | ERCC1     | Excision repair cross-complementing rodent repair deficiency, complementation group 1             |
| 202414_at               | 0.00081  | 0.5   | ERCC5     | excision repair cross-complementing rodent repair deficiency, complementation group 5             |
| 200792_at               | 8.07E-05 | 0.7   | G22P1     | thyroid autoantigen 70kDa (Ku antigen)                                                            |
| 204528_s_at             | 0.000528 | 0.6   | NAP1L1    | nucleosome assembly protein 1-like 1                                                              |
| 212967_x_at             | 8.07E-05 | 0.7   | NAP1L1    | nucleosome assembly protein 1-like 1                                                              |
| 213864_s_at             | 0.000528 | 0.6   | NAP1L1    | nucleosome assembly protein 1-like 1                                                              |
| 203939_at               | 0.00393  | 0.5   | NT5E      | 5'-nucleotidase, ecto (CD73)                                                                      |
| 212917_x_at             | 0.000528 | 0.6   | RECQL     | RecQ protein-like (DNA helicase Q1-like)                                                          |
| 213047_x_at             | 0.00806  | 0.7   | SET       | SET translocation (myeloid leukemia-associated)                                                   |
| 40189_at                | 0.00393  | 0.7   | SET       | SET translocation (myeloid leukemia-associated)                                                   |
| 208901_s_at             | 0.00806  | 1.8   | TOP1      | topoisomerase (DNA) I                                                                             |
| 201513_at               | 0.000528 | 0.5   | TSN       | translin                                                                                          |
| 208886_at               | 0.00123  | 2.2   | H1F0      | H1 histone family, member 0                                                                       |
| 209398_at               | 0.000528 | 4.1   | HIST1H1C  | histone 1, H1c                                                                                    |
| 221493_at               | 0.00566  | 0.7   | TSPYL1    | TSPY-like 1                                                                                       |
| cell adhesion           |          |       |           |                                                                                                   |
| 226016_at               | 0.00183  | 0.6   | CD47      | CD47 antigen (Rh-related antigen, integrin-associated signal transducer)                          |
| 202468_s_at             | 1.30E-06 | 5.4   | CTNNA1    | catenin (cadherin-associated protein), alpha-like 1                                               |
| 226817_at               | 8.07E-05 | 2.6   | DSC2      | desmocollin 2                                                                                     |
| 204714_s_at             | 0.000133 | 2.7   | F5        | coagulation factor V (proaccelerin, labile factor)                                                |
| 205786_s_at             | 0.0027   | 1.6   | ITGAM     | integrin, alpha M (complement component receptor 3, alpha (CD11b))                                |
| 204563_at               | 0.00123  | 1.4   | SELL      | selectin L (lymphocyte adhesion molecule 1)                                                       |
| 225246_at               | 0.000528 | 0.7   | STIM2     | stromal interaction molecule 2                                                                    |
| 215706_x_at             | 0.000214 | 2.2   | ZYX       | zyxin                                                                                             |
| chromatin               |          |       |           |                                                                                                   |
| 238043_at               | 0.00081  | 0.6   | ARID1B    | AT rich interactive domain 1B (SWI1-like)                                                         |
| 205062_x_at             | 0.000339 | 0.5   | ARID4A    | AT rich interactive domain 4A (RBP1-like)                                                         |
| 227558_at               | 0.00393  | 0.5   | CBX4      | chromobox homolog 4 (Pc class homolog, Drosophila)                                                |
| 213251_at               | 0.00393  | 0.6   | SMARCA5   | SWI/SNF related, matrix associated, actin dependent regulator of chromatin, subfamily a, member 5 |
| other                   |          |       |           |                                                                                                   |
| 211560_s_at             | 1.30E-06 | 593.4 | ALAS2     | aminolevulinate, delta-, synthase 2 (sideroblastic/hypochromic                                    |

anemia)

|             |          |     |         |                                                                                                                  |
|-------------|----------|-----|---------|------------------------------------------------------------------------------------------------------------------|
| 201366_at   | 8.96E-06 | 0.6 | ANXA7   | annexin A7                                                                                                       |
| 210027_s_at | 1.61E-05 | 0.7 | APEX1   | APEX nuclease (multifunctional DNA repair enzyme) 1                                                              |
| 244875_at   | 1.30E-06 | 5.8 | ASMTL   | Acetylserotonin O-methyltransferase-like                                                                         |
| 208677_s_at | 2.56E-06 | 4.7 | BSG     | basigin (OK blood group)                                                                                         |
| 211727_s_at | 0.00183  | 0.6 | COX11   | COX11 homolog, cytochrome c oxidase assembly protein (yeast)                                                     |
| 215001_s_at | 2.82E-05 | 2.0 | GLUL    | glutamate-ammonia ligase (glutamine synthase)                                                                    |
| 217202_s_at | 2.56E-06 | 5.4 | GLUL    | glutamate-ammonia ligase (glutamine synthase)                                                                    |
| 220404_at   | 8.90E-06 | 5.0 | GPR97   | G protein-coupled receptor 97                                                                                    |
| 200075_s_at | 2.82E-05 | 2.8 | GUK1    | guanylate kinase 1                                                                                               |
| 202947_s_at | 4.86E-06 | 5.4 | GYPC    | glycophorin C (Gerbich blood group)                                                                              |
| 214470_at   | 0.00566  | 0.4 | KLRB1   | killer cell lectin-like receptor subfamily B, member 1                                                           |
| 227250_at   | 0.000339 | 7.4 | KREMEN1 | Kringle containing transmembrane protein 1                                                                       |
| 201153_s_at | 0.000133 | 0.7 | MBNL1   | muscleblind-like (Drosophila)                                                                                    |
| 203774_at   | 0.00081  | 0.6 | MTR     | 5-methyltetrahydrofolate-homocysteine methyltransferase                                                          |
| 201707_at   | 0.000339 | 0.6 | PEX19   | peroxisomal biogenesis factor 19                                                                                 |
| 202446_s_at | 4.86E-06 | 3.1 | PLSCR1  | phospholipid scramblase 1                                                                                        |
| 200845_s_at | 0.000214 | 0.6 | PRDX6   | peroxiredoxin 6                                                                                                  |
| 226577_at   | 2.82E-05 | 1.5 | PSEN1   | Presenilin 1 (Alzheimer disease 3)                                                                               |
| 218428_s_at | 1.61E-05 | 0.6 | REV1L   | REV1-like (yeast)                                                                                                |
| 46665_at    | 0.0027   | 0.5 | SEMA4C  | sema domain, immunoglobulin domain (Ig), transmembrane domain (TM) and short cytoplasmic domain, (semaphorin) 4C |
| 200652_at   | 2.82E-05 | 0.6 | SSR2    | signal sequence receptor, beta (translocon-associated protein beta)                                              |
| 203887_s_at | 0.000528 | 4.8 | THBD    | thrombomodulin                                                                                                   |
| 207196_s_at | 8.96E-06 | 1.8 | TNIP1   | TNFAIP3 interacting protein 1                                                                                    |
| 205672_at   | 0.000214 | 0.6 | XPA     | xeroderma pigmentosum, complementation group A                                                                   |
| 227594_at   | 0.000528 | 0.6 | ZNF258  | zinc finger protein 258                                                                                          |

### Unknown

|             |          |      |           |                                                                      |
|-------------|----------|------|-----------|----------------------------------------------------------------------|
| 205566_at   | 0.00123  | 1.8  | ABHD2     | abhydrolase domain containing 2                                      |
| 226665_at   | 0.00081  | 0.4  | AHSA2     | AHA1, activator of heat shock 90kDa protein ATPase homolog 2 (yeast) |
| 212174_at   | 8.03E-05 | 0.7  | AK2       | adenylate kinase 2                                                   |
| 226718_at   | 2.82E-05 | 0.5  | AMIGO     | amphoterin-induced gene and ORF                                      |
| 222108_at   | 0.00081  | 0.6  | AMIGO2    | amphoterin induced gene 2                                            |
| 238439_at   | 0.00183  | 6.1  | ANKRD22   | ankyrin repeat domain 22                                             |
| 239196_at   | 0.000528 | 2.5  | ANKRD22   | ankyrin repeat domain 22                                             |
| 230972_at   | 4.82E-05 | 6.7  | ANKRD9    | ankyrin repeat domain 9                                              |
| 209369_at   | 0.000337 | 15.4 | ANXA3     | annexin A3                                                           |
| 202492_at   | 0.00081  | 2.0  | APG9L1    | APG9 autophagy 9-like 1 (S. cerevisiae)                              |
| 225618_at   | 0.00183  | 0.6  | ARHGAP27  | Rho GTPase activating protein 27                                     |
| 202655_at   | 2.82E-05 | 2.1  | ARMET     | arginine-rich, mutated in early stage tumors                         |
| 226055_at   | 1.30E-06 | 0.5  | ARRDC2*   | arrestin domain containing 2                                         |
| 215440_s_at | 1.30E-06 | 0.5  | BEXL1     | brain expressed X-linked-like 1                                      |
| 202201_at   | 4.82E-05 | 4.7  | BLVRB     | biliverdin reductase B (flavin reductase (NADPH))                    |
| 209846_s_at | 0.000528 | 0.5  | BTN3A2    | butyrophilin, subfamily 3, member A2                                 |
| 55662_at    | 0.000339 | 0.7  | C10orf76  | chromosome 10 open reading frame 76                                  |
| 213239_at   | 1.61E-05 | 0.5  | C13orf24  | chromosome 13 open reading frame 24                                  |
| 218572_at   | 2.56E-06 | 0.4  | C14orf123 | chromosome 14 open reading frame 123                                 |
| 221932_s_at | 1.30E-06 | 10.7 | C14orf87* | chromosome 14 open reading frame 87                                  |
| 203289_s_at | 4.86E-06 | 9.2  | C16orf35  | chromosome 16 open reading frame 35                                  |
| 214273_x_at | 2.82E-05 | 5.6  | C16orf35  | chromosome 16 open reading frame 35                                  |



|             |          |      |               |                                                                                   |
|-------------|----------|------|---------------|-----------------------------------------------------------------------------------|
| 221764_at   | 2.56E-06 | 4.0  | C19orf22      | chromosome 19 open reading frame 22                                               |
| 55705_at    | 1.30E-06 | 2.9  | C19orf22*     | chromosome 19 open reading frame 22                                               |
| 226105_at   | 0.00183  | 0.6  | C1GALT1       | Core 1 UDP-galactose:N-acetylgalactosamine-alpha-R beta 1,3-galactosyltransferase |
| 224690_at   | 8.96E-06 | 7.8  | C20orf108     | chromosome 20 open reading frame 108                                              |
| 224693_at   | 1.30E-06 | 5.3  | C20orf108*    | chromosome 20 open reading frame 108                                              |
| 225252_at   | 0.000528 | 2.5  | C20orf139     | chromosome 20 open reading frame 139                                              |
| 228291_s_at | 0.00566  | 0.7  | C20orf19      | chromosome 20 open reading frame 19                                               |
| 223039_at   | 0.00183  | 2.4  | C22orf13      | chromosome 22 open reading frame 13                                               |
| 218518_at   | 4.82E-05 | 0.6  | C5orf5        | chromosome 5 open reading frame 5                                                 |
| 220755_s_at | 2.56E-06 | 0.6  | C6orf48       | chromosome 6 open reading frame 48                                                |
| 226443_at   | 2.82E-05 | 1.6  | C9orf42       | chromosome 9 open reading frame 42                                                |
| 218929_at   | 0.00393  | 0.7  | CARF          | collaborates/cooperates with ARF (alternate reading frame) protein                |
| 223084_s_at | 0.0027   | 2.4  | CCNDBP1       | cyclin D-type binding-protein 1                                                   |
| 34210_at    | 4.86E-06 | 0.6  | CD52          | CD52 antigen (CAMPATH-1 antigen)                                                  |
| 200663_at   | 0.00123  | 1.9  | CD63          | CD63 antigen (melanoma 1 antigen)                                                 |
| 204577_s_at | 1.30E-06 | 0.4  | CLUAP1*       | clusterin associated protein 1                                                    |
| 223431_at   | 0.0027   | 0.7  | CNO           | cappuccino                                                                        |
| 222702_x_at | 1.30E-06 | 1.6  | CRIPT*        | postsynaptic protein CRIPT                                                        |
| 225216_at   | 0.00183  | 0.6  | CXorf39       | chromosome X open reading frame 39                                                |
| 242292_at   | 0.000133 | 0.5  | CXorf50       | chromosome X open reading frame 50                                                |
| 215785_s_at | 2.82E-05 | 0.5  | CYFIP2        | cytoplasmic FMR1 interacting protein 2                                            |
| 212690_at   | 0.00081  | 0.6  | DDHD2         | DDHD domain containing 2                                                          |
| 201788_at   | 0.0027   | 0.6  | DDX42         | DEAD (Asp-Glu-Ala-Asp) box polypeptide 42                                         |
| 228039_at   | 4.82E-05 | 0.5  | DDX46         | DEAD (Asp-Glu-Ala-Asp) box polypeptide 46                                         |
| 213701_at   | 0.0027   | 0.5  | DKFZp434N2030 | hypothetical protein DKFZp434N2030                                                |
| 227309_at   | 0.00183  | 5.3  | DKFZp451J1719 | hypothetical DKFZp451J1719                                                        |
| 202537_s_at | 0.0027   | 0.6  | DKFZP564O123  | DKFZP564O123 protein                                                              |
| 226657_at   | 1.61E-05 | 2.6  | DKFZp762H185  | hypothetical protein DKFZp762H185                                                 |
| 225405_at   | 0.000214 | 0.6  | DKFZp762N1910 | Hypothetical protein DKFZp762N1910                                                |
| 220320_at   | 1.61E-05 | 2.4  | DOK3          | docking protein 3                                                                 |
| 223553_s_at | 0.000133 | 2.9  | DOK3          | docking protein 3                                                                 |
| 226009_at   | 0.000337 | 2.0  | DPCD          | deleted in a mouse model of primary ciliary dyskinesia                            |
| 212830_at   | 8.07E-05 | 1.9  | EGFL5         | EGF-like-domain, multiple 5                                                       |
| 212653_s_at | 0.00393  | 0.6  | EHBP1         | EH domain binding protein 1                                                       |
| 215096_s_at | 0.000339 | 0.7  | ESD           | esterase D/formylglutathione hydrolase                                            |
| 218100_s_at | 1.30E-06 | 0.5  | ESRRBL1*      | estrogen-related receptor beta like 1                                             |
| 241981_at   | 0.00183  | 5.0  | FAM20A        | family with sequence similarity 20, member A                                      |
| 220547_s_at | 0.00566  | 0.6  | FAM35A        | family with sequence similarity 35, member A                                      |
| 224820_at   | 0.00123  | 0.7  | FAM36A        | family with sequence similarity 36, member A                                      |
| 201889_at   | 0.000339 | 0.6  | FAM3C         | family with sequence similarity 3, member C                                       |
| 225030_at   | 0.00123  | 0.7  | FAM44B        | family with sequence similarity 44, member B                                      |
| 226811_at   | 1.30E-06 | 10.1 | FAM46C*       | family with sequence similarity 46, member C                                      |
| 204335_at   | 0.00566  | 0.5  | FLJ10374      | hypothetical protein FLJ10374                                                     |
| 218545_at   | 8.07E-05 | 0.7  | FLJ11088      | GGA binding partner                                                               |
| 217828_at   | 0.00566  | 0.7  | FLJ13213      | hypothetical protein FLJ13213                                                     |
| 225350_s_at | 0.00566  | 0.8  | FLJ13456      | Hypothetical protein FLJ13456                                                     |
| 226521_s_at | 0.00123  | 0.6  | FLJ13614      | hypothetical protein FLJ13614                                                     |
| 233543_s_at | 0.00803  | 0.7  | FLJ13614      | hypothetical protein FLJ13614                                                     |
| 212995_x_at | 1.61E-05 | 0.6  | FLJ14346      | hypothetical protein FLJ14346                                                     |
| 225319_s_at | 0.0027   | 2.6  | FLJ14775      | hypothetical protein FLJ14775                                                     |

|             |          |      |           |                                                      |
|-------------|----------|------|-----------|------------------------------------------------------|
| 218532_s_at | 0.00393  | 0.5  | FLJ20152  | hypothetical protein FLJ20152                        |
| 219093_at   | 0.000339 | 0.4  | FLJ20701  | hypothetical protein FLJ20701                        |
| 218932_at   | 0.00123  | 0.6  | FLJ20729  | hypothetical protein FLJ20729                        |
| 51200_at    | 0.00123  | 0.5  | FLJ20850  | hypothetical protein FLJ20850                        |
| 223528_s_at | 0.00183  | 0.6  | FLJ20859  | FLJ20859 gene                                        |
| 219029_at   | 0.000528 | 0.5  | FLJ21657  | hypothetical protein FLJ21657                        |
| 218842_at   | 0.00183  | 0.7  | FLJ21908  | hypothetical protein FLJ21908                        |
| 218454_at   | 0.000214 | 2.3  | FLJ22662  | hypothetical protein FLJ22662                        |
| 235052_at   | 0.000214 | 0.4  | FLJ38451  | FLJ38451 protein                                     |
| 64432_at    | 2.82E-05 | 0.5  | FLJ39616  | apoptosis-related protein PNAS-1                     |
| 208749_x_at | 4.82E-05 | 2.1  | FLOT1     | flotillin 1                                          |
| 210142_x_at | 8.96E-06 | 2.5  | FLOT1     | flotillin 1                                          |
| 202232_s_at | 4.82E-05 | 0.5  | GA17      | dendritic cell protein                               |
| 224719_s_at | 0.00081  | 0.6  | GRCC10    | likely ortholog of mouse gene rich cluster, C10 gene |
| 211820_x_at | 2.56E-06 | 8.3  | GYPA      | glycophorin A (includes MN blood group)              |
| 211821_x_at | 1.30E-06 | 36.0 | GYPA*     | glycophorin A (includes MN blood group)              |
| 207459_x_at | 8.96E-06 | 9.1  | GYPB      | glycophorin B (includes Ss blood group)              |
| 214407_x_at | 1.30E-06 | 10.5 | GYPB      | glycophorin B (includes Ss blood group)              |
| 216833_x_at | 0.000133 | 5.8  | GYPB      | glycophorin B (includes Ss blood group)              |
| 205012_s_at | 2.56E-06 | 2.9  | HAGH      | hydroxyacylglutathione hydrolase                     |
| 217414_x_at | 0.00806  | 3.1  | HBA2      | hemoglobin, alpha 2                                  |
| 221425_s_at | 0.00393  | 3.8  | HBLD2     | HESB like domain containing 2                        |
| 225584_at   | 0.00081  | 0.5  | HCG18     | CDNA clone IMAGE:5265581, partial cds                |
| 217965_s_at | 1.61E-05 | 0.5  | HCNGP     | transcriptional regulator protein                    |
| 223252_at   | 0.00123  | 1.6  | HDGF2     | hepatoma-derived growth factor-related protein 2     |
| 228736_at   | 0.00806  | 0.6  | HEL308    | DNA helicase HEL308                                  |
| 223670_s_at | 2.82E-05 | 10.2 | HEMGN     | hemogen                                              |
| 218946_at   | 0.00081  | 0.6  | HIRIP5    | HIRA interacting protein 5                           |
| 214290_s_at | 0.00123  | 2.4  | HIST2H2AA | histone 2, H2aa                                      |
| 218280_x_at | 0.000528 | 2.1  | HIST2H2AA | histone 2, H2aa                                      |
| 232209_x_at | 0.00566  | 0.5  | HM13      | histocompatibility (minor) 13                        |
| 209787_s_at | 0.0027   | 0.7  | HMGN4     | high mobility group nucleosomal binding domain 4     |
| 211929_at   | 8.96E-06 | 0.5  | HNRPA3    | heterogeneous nuclear ribonucleoprotein A3           |
| 203203_s_at | 0.00393  | 0.5  | HRB2      | HIV-1 rev binding protein 2                          |
| 225845_at   | 0.000339 | 0.6  | HSPC063   | HSPC063 protein                                      |
| 223124_s_at | 0.000133 | 5.6  | HT014     | HT014                                                |
| 213804_at   | 0.00183  | 0.5  | INPP5B    | inositol polyphosphate-5-phosphatase, 75kDa          |
| 218569_s_at | 0.00081  | 0.4  | KBTBD4    | kelch repeat and BTB (POZ) domain containing 4       |
| 212267_at   | 0.00081  | 0.7  | KIAA0261  | KIAA0261                                             |
| 212355_at   | 0.0027   | 1.4  | KIAA0323  | KIAA0323                                             |
| 204308_s_at | 0.000528 | 1.7  | KIAA0329  | KIAA0329                                             |
| 201855_s_at | 0.00183  | 0.6  | KIAA0431  | KIAA0431 protein                                     |
| 212675_s_at | 0.00566  | 0.5  | KIAA0582  | KIAA0582                                             |
| 34260_at    | 0.00564  | 0.5  | KIAA0683  | KIAA0683 gene product                                |
| 212201_at   | 0.00806  | 0.7  | KIAA0692  | KIAA0692 protein                                     |
| 228549_at   | 4.86E-06 | 0.5  | KIAA0792  | KIAA0792 gene product                                |
| 230546_at   | 0.00806  | 1.6  | KIAA1036  | KIAA1036                                             |
| 212754_s_at | 0.000339 | 0.6  | KIAA1040  | KIAA1040 protein                                     |
| 221495_s_at | 0.00393  | 0.7  | KIAA1049  | KIAA1049 protein                                     |
| 207765_s_at | 0.00806  | 2.2  | KIAA1539  | KIAA1539                                             |

|             |          |     |            |                                                                                           |
|-------------|----------|-----|------------|-------------------------------------------------------------------------------------------|
| 211433_x_at | 0.0027   | 2.4 | KIAA1539   | KIAA1539                                                                                  |
| 231850_x_at | 1.30E-06 | 0.5 | KIAA1712   | KIAA1712                                                                                  |
| 234671_at   | 0.000339 | 2.1 | KRTAP4-2   | keratin associated protein 4-2                                                            |
| 208117_s_at | 0.000133 | 0.6 | LAS1L      | LAS1-like ( <i>S. cerevisiae</i> )                                                        |
| 223162_s_at | 8.96E-06 | 0.6 | LCHN       | LCHN protein                                                                              |
| 209179_s_at | 0.000133 | 2.8 | LENG4      | leukocyte receptor cluster (LRC) member 4                                                 |
| 203276_at   | 0.00566  | 3.1 | LMNB1      | lamin B1                                                                                  |
| 228930_at   | 2.56E-06 | 0.5 | LOC123722  | Hypothetical protein LOC123722                                                            |
| 235568_at   | 8.07E-05 | 6.3 | LOC199675  | hypothetical protein LOC199675                                                            |
| 235587_at   | 1.30E-06 | 0.5 | LOC202781* | hypothetical protein LOC202781                                                            |
| 35156_at    | 0.00081  | 0.6 | LOC203069  | hypothetical protein LOC203069                                                            |
| 222662_at   | 8.07E-05 | 2.4 | LOC286044  | hypothetical protein LOC286044                                                            |
| 229323_at   | 0.00123  | 0.4 | LOC387723  | hypothetical LOC387723                                                                    |
| 216565_x_at | 0.00806  | 1.9 | LOC391020  | similar to Interferon-induced transmembrane protein 3 (Interferon-inducible protein 1-8U) |
| 225635_s_at | 0.000214 | 0.5 | LOC401504  | hypothetical gene supported by AK091718                                                   |
| 240890_at   | 4.82E-05 | 0.5 | LOC440066  | similar to Caspase-4 precursor (CASP-4) (ICH-2 protease) (TX protease) (ICE(rel)-II)      |
| 229872_s_at | 0.000339 | 0.6 | LOC440667  | LOC440667                                                                                 |
| 237563_s_at | 0.000214 | 2.2 | LOC440731  | LOC440731                                                                                 |
| 226686_at   | 0.00081  | 3.3 | LOC493856  | similar to RIKEN cDNA 1500009M05 gene                                                     |
| 226689_at   | 0.00393  | 3.4 | LOC493856  | similar to RIKEN cDNA 1500009M05 gene                                                     |
| 217882_at   | 2.82E-05 | 2.2 | LOC55831   | 30 kDa protein                                                                            |
| 228775_at   | 0.00081  | 2.1 | LOC55831   | 30 kDa protein                                                                            |
| 225705_at   | 0.00566  | 0.6 | LOC90799   | hypothetical protein BC009518                                                             |
| 235778_s_at | 0.00183  | 0.5 | LOC91526   | hypothetical protein DKFZp434D2328                                                        |
| 213224_s_at | 0.00806  | 0.5 | LOC92482   | hypothetical protein LOC92482                                                             |
| 228993_s_at | 8.07E-05 | 0.4 | LOC92482   | hypothetical protein LOC92482                                                             |
| 210102_at   | 1.61E-05 | 2.1 | LOH11CR2A  | loss of heterozygosity, 11, chromosomal region 2, gene A                                  |
| 228253_at   | 2.82E-05 | 1.5 | LOXL3      | lysyl oxidase-like 3                                                                      |
| 219630_at   | 0.00566  | 3.9 | MAP17      | membrane-associated protein 17                                                            |
| 220603_s_at | 0.0027   | 2.4 | MCTP2      | multiple C2-domains with two transmembrane regions 2                                      |
| 223754_at   | 0.000214 | 3.3 | MGC13057   | hypothetical protein MGC13057                                                             |
| 227402_s_at | 8.07E-05 | 0.4 | MGC14595   | hypothetical protein MGC14595                                                             |
| 226448_at   | 8.96E-06 | 2.4 | MGC15887   | hypothetical gene supported by BC009447                                                   |
| 224759_s_at | 0.00566  | 0.5 | MGC17943   | hypothetical protein MGC17943                                                             |
| 212340_at   | 0.000528 | 2.4 | MGC21416   | hypothetical protein MGC21416                                                             |
| 204985_s_at | 0.00566  | 0.5 | MGC2650    | hypothetical protein MGC2650                                                              |
| 229736_at   | 0.0027   | 2.1 | MGC30208   | hypothetical protein MGC30208                                                             |
| 235005_at   | 0.00183  | 0.5 | MGC4562    | hypothetical protein MGC4562                                                              |
| 221580_s_at | 0.00393  | 0.7 | MGC5306    | hypothetical protein MGC5306                                                              |
| 220615_s_at | 0.00393  | 3.2 | MLSTD1     | male sterility domain containing 1                                                        |
| 239108_at   | 0.00806  | 2.4 | MLSTD1     | Male sterility domain containing 1                                                        |
| 211685_s_at | 0.000528 | 0.6 | NCALD      | neurocalcin delta                                                                         |
| 210097_s_at | 0.00183  | 0.7 | NOL7       | nucleolar protein 7, 27kDa                                                                |
| 209007_s_at | 0.000214 | 0.4 | NPD014     | NPD014 protein                                                                            |
| 219458_s_at | 0.00123  | 1.9 | NSUN3      | NOL1/NOP2/Sun domain family, member 3                                                     |
| 203718_at   | 0.000133 | 2.0 | NTE        | neuropathy target esterase                                                                |
| 200649_at   | 8.07E-05 | 2.0 | NUCB1      | nucleobindin 1                                                                            |
| 217802_s_at | 0.00393  | 0.6 | NUCKS      | nuclear ubiquitous casein kinase and cyclin-dependent kinase substrate                    |
| 226726_at   | 2.56E-06 | 4.0 | OACT2      | O-acyltransferase (membrane bound) domain containing 2                                    |

|             |          |       |            |                                                                                                         |
|-------------|----------|-------|------------|---------------------------------------------------------------------------------------------------------|
| 223011_s_at | 8.96E-06 | 0.6   | OCIAD1     | OCIA domain containing 1                                                                                |
| 241881_at   | 2.56E-06 | 13.4  | OR2W3      | olfactory receptor, family 2, subfamily W, member 3                                                     |
| 201245_s_at | 0.00393  | 0.8   | OTUB1      | OTU domain, ubiquitin aldehyde binding 1                                                                |
| 202671_s_at | 0.00183  | 1.7   | PDXK       | pyridoxal (pyridoxine, vitamin B6) kinase                                                               |
| 33760_at    | 0.000528 | 0.6   | PEX14      | peroxisomal biogenesis factor 14                                                                        |
| 201701_s_at | 0.00081  | 0.5   | PGRMC2     | progesterone receptor membrane component 2                                                              |
| 226247_at   | 2.82E-05 | 0.5   | PLEKHA1    | pleckstrin homology domain containing, family A (phosphoinositide binding specific) member 1            |
| 212705_x_at | 8.07E-05 | 2.7   | PNPLA2     | patatin-like phospholipase domain containing 2                                                          |
| 207000_s_at | 2.82E-05 | 0.5   | PPP3CC     | protein phosphatase 3 (formerly 2B), catalytic subunit, gamma isoform (calcineurin A gamma)             |
| 32541_at    | 8.07E-05 | 0.5   | PPP3CC     | protein phosphatase 3 (formerly 2B), catalytic subunit, gamma isoform (calcineurin A gamma)             |
| 204507_s_at | 8.96E-06 | 3.3   | PPP3R1     | protein phosphatase 3 (formerly 2B), regulatory subunit B, 19kDa, alpha isoform (calcineurin B, type I) |
| 209337_at   | 0.000339 | 0.6   | PSIP1      | PC4 and SFRS1 interacting protein 1                                                                     |
| 202897_at   | 0.000337 | 2.1   | PTPNS1     | protein tyrosine phosphatase, non-receptor type substrate 1                                             |
| 212168_at   | 0.00393  | 0.7   | RBM12      | RNA binding motif protein 12                                                                            |
| 225310_at   | 4.82E-05 | 0.6   | RBMX       | RNA binding motif protein, X-linked                                                                     |
| 213338_at   | 0.0027   | 10.5  | RIS1       | Ras-induced senescence 1                                                                                |
| 223609_at   | 0.000214 | 2.5   | ROPN1L     | ropporin 1-like                                                                                         |
| 223656_s_at | 0.00081  | 1.5   | RP4-622L5  | hypothetical protein RP4-622L5                                                                          |
| 205087_at   | 8.07E-05 | 0.6   | RWDD3      | RWD domain containing 3                                                                                 |
| 214433_s_at | 1.30E-06 | 101.4 | SELENBP1   | selenium binding protein 1                                                                              |
| 233587_s_at | 0.00081  | 2.2   | SIPA1L2    | signal-induced proliferation-associated 1 like 2                                                        |
| 203021_at   | 0.00123  | 4.4   | SLPI       | secretory leukocyte protease inhibitor (antileukoproteinase)                                            |
| 211988_at   | 4.86E-06 | 0.5   | SMARCE1    | SWI/SNF related, matrix associated, actin dependent regulator of chromatin, subfamily e, member 1       |
| 224640_at   | 0.000528 | 1.7   | SPPL3      | signal peptide peptidase 3                                                                              |
| 201225_s_at | 0.000994 | 0.8   | SRRM1      | serine/arginine repetitive matrix 1                                                                     |
| 207320_x_at | 0.00081  | 1.7   | STAU       | staufen, RNA binding protein (Drosophila)                                                               |
| 208948_s_at | 0.00566  | 1.4   | STAU       | staufen, RNA binding protein (Drosophila)                                                               |
| 225396_at   | 1.30E-06 | 0.6   | SYNCOILIN* | Intermediate filament protein syncoilin                                                                 |
| 223231_at   | 0.00081  | 0.6   | TATDN1     | TatD DNase domain containing 1                                                                          |
| 226664_at   | 0.000214 | 2.0   | TBC1D20    | TBC1 domain family, member 20                                                                           |
| 208089_s_at | 0.00269  | 0.5   | TDRD3      | tudor domain containing 3                                                                               |
| 206555_s_at | 0.000132 | 0.5   | THUMPD1    | THUMP domain containing 1                                                                               |
| 217979_at   | 4.82E-05 | 0.4   | TM4SF13    | transmembrane 4 superfamily member 13                                                                   |
| 209890_at   | 8.07E-05 | 7.4   | TM4SF9     | transmembrane 4 superfamily member 9                                                                    |
| 225387_at   | 0.000339 | 8.2   | TM4SF9     | transmembrane 4 superfamily member 9                                                                    |
| 225388_at   | 8.96E-06 | 4.3   | TM4SF9     | transmembrane 4 superfamily member 9                                                                    |
| 218872_at   | 0.00806  | 2.7   | TSC        | hypothetical protein FLJ20607                                                                           |
| 225180_at   | 0.0027   | 0.6   | TTC14      | tetratricopeptide repeat domain 14                                                                      |
| 219192_at   | 0.00564  | 0.7   | UBAP2      | ubiquitin associated protein 2                                                                          |
| 220757_s_at | 1.61E-05 | 5.2   | UBXD1      | UBX domain containing 1                                                                                 |
| 223012_at   | 0.000214 | 4.4   | UBXD1      | UBX domain containing 1                                                                                 |
| 218050_at   | 0.00183  | 0.5   | Ufm1       | ubiquitin-fold modifier 1                                                                               |
| 207628_s_at | 0.00123  | 0.7   | WBSCR22    | Williams Beuren syndrome chromosome region 22                                                           |
| 212602_at   | 0.000133 | 2.8   | WDFY3      | WD repeat and FYVE domain containing 3                                                                  |
| 222804_x_at | 2.82E-05 | 1.9   | WDR32      | WD repeat domain 32                                                                                     |
| 224789_at   | 2.56E-06 | 9.0   | WDR40A     | WD repeat domain 40A                                                                                    |
| 209216_at   | 0.00393  | 2.2   | WDR45      | WD repeat domain 45                                                                                     |
| 209217_s_at | 0.0027   | 1.7   | WDR45      | WD repeat domain 45                                                                                     |

|             |          |      |         |                                                                                                         |
|-------------|----------|------|---------|---------------------------------------------------------------------------------------------------------|
| 40829_at    | 0.00123  | 1.6  | WDTC1   | WD and tetratricopeptide repeats 1                                                                      |
| 223179_at   | 8.07E-05 | 3.3  | YPEL3   | yippee-like 3 (Drosophila)                                                                              |
| 225629_s_at | 4.82E-05 | 0.7  | ZBTB4   | zinc finger and BTB domain containing 4                                                                 |
| 226496_at   | 4.86E-06 | 0.5  | ZCCHC7  | zinc finger, CCHC domain containing 7                                                                   |
| 222730_s_at | 1.30E-06 | 3.0  | ZDHHC2* | zinc finger, DHHC domain containing 2                                                                   |
| 224593_at   | 0.00123  | 0.6  | ZFOC1   | zinc finger protein ZFOC1                                                                               |
| 221848_at   | 0.00393  | 0.6  | ZGPAT   | zinc finger, CCCH-type with G patch domain                                                              |
| 57539_at    | 0.00123  | 0.7  | ZGPAT   | zinc finger, CCCH-type with G patch domain                                                              |
| 221626_at   | 0.000339 | 0.5  | ZNF506  | zinc finger protein 506                                                                                 |
| 227670_at   | 2.82E-05 | 0.6  | ZNF75A  | zinc finger protein 75a                                                                                 |
| 226680_at   | 0.000528 | 0.6  | ZNFN1A5 | Zinc finger protein, subfamily 1A, 5                                                                    |
| 225131_at   | 0.0027   | 2.2  | ZRANB1  | zinc finger, RAN-binding domain containing 1                                                            |
| 212893_at   | 0.00393  | 0.6  | ZZZ3    | zinc finger, ZZ domain containing 3                                                                     |
| 200067_x_at | 0.00806  | 2.0  | ---     | ---                                                                                                     |
| 208540_x_at | 0.000528 | 2.3  | ---     | ---                                                                                                     |
| 209193_at   | 0.00806  | 2.5  | ---     | ---                                                                                                     |
| 211781_x_at | 4.82E-05 | 5.5  | ---     | ---                                                                                                     |
| 211994_at   | 4.82E-05 | 2.8  | ---     | Clone A9A2BRB5 (CAC)n/(GTG)n repeat-containing mRNA.                                                    |
| 213048_s_at | 0.000528 | 0.5  | ---     | ---                                                                                                     |
| 213416_at   | 0.00081  | 0.6  | ---     | ---                                                                                                     |
| 213608_s_at | 4.82E-05 | 4.7  | ---     | Similar to SRR1-like protein                                                                            |
| 214394_x_at | 2.56E-06 | 0.5  | ---     | ---                                                                                                     |
| 215604_x_at | 4.82E-05 | 0.4  | ---     | ---                                                                                                     |
| 215963_x_at | 1.61E-05 | 0.5  | ---     | ---                                                                                                     |
| 216177_at   | 0.000528 | 0.4  | ---     | ---                                                                                                     |
| 216508_x_at | 0.00392  | 0.6  | ---     | ---                                                                                                     |
| 216570_x_at | 1.30E-06 | 0.6  | ---     | ---                                                                                                     |
| 217019_at   | 8.07E-05 | 0.4  | ---     | ---                                                                                                     |
| 217499_x_at | 0.000528 | 1.8  | ---     | PREDICTED: Homo sapiens olfactory receptor, family 7, subfamily E, member 31 pseudogene (OR7E31P), mRNA |
| 217946_s_at | 0.00566  | 0.7  | ---     | ---                                                                                                     |
| 221963_x_at | 0.000213 | 0.7  | ---     | ---                                                                                                     |
| 222431_at   | 0.000339 | 0.6  | ---     | ---                                                                                                     |
| 224709_s_at | 0.00123  | 0.6  | ---     | ---                                                                                                     |
| 224752_at   | 0.000528 | 3.0  | ---     | Homo sapiens, Similar to hypothetical protein MGC10526, clone IMAGE:4133906, mRNA                       |
| 224929_at   | 0.00123  | 1.6  | ---     | ---                                                                                                     |
| 225176_at   | 0.000528 | 0.6  | ---     | MSTP146 (MST146)                                                                                        |
| 225492_at   | 0.00566  | 1.7  | ---     | CDNA FLJ32412 fis, clone SKMUS2000690                                                                   |
| 225595_at   | 0.00806  | 0.3  | ---     | MRNA; cDNA DKFZp566P1124 (from clone DKFZp566P1124)                                                     |
| 225856_at   | 0.000339 | 0.6  | ---     | Homo sapiens, clone IMAGE:5267398, mRNA                                                                 |
| 226179_at   | 1.30E-06 | 20.9 | ---     | FP15737                                                                                                 |
| 226272_at   | 0.000528 | 0.6  | ---     | Full length insert cDNA clone ZD79H10                                                                   |
| 226542_at   | 0.00566  | 1.9  | ---     | Full-length cDNA clone CS0DJ002YF02 of T cells (Jurkat cell line)                                       |
| 226765_at   | 0.00393  | 0.4  | ---     | Cot 10-normalized of Homo sapiens (human)                                                               |
| 227184_at   | 0.00123  | 2.0  | ---     | ---                                                                                                     |
| 228390_at   | 0.00183  | 0.4  | ---     | Transcribed locus, weakly similar to NP_071385.1 chromosome 6 open reading frame 79 [Homo sapiens]      |
| 228634_s_at | 1.61E-05 | 3.0  | ---     | Homo sapiens, clone IMAGE:5259272, mRNA                                                                 |
| 228812_at   | 0.00566  | 0.5  | ---     | ---                                                                                                     |
| 228853_at   | 0.00393  | 0.6  | ---     | Transcribed locus, weakly similar to NP_689672.2 hypothetical protein MGC45438 [Homo sapiens]           |



|             |          |      |     |                                                                                                             |
|-------------|----------|------|-----|-------------------------------------------------------------------------------------------------------------|
| 229064_s_at | 0.0027   | 0.5  | --- | ---                                                                                                         |
| 229111_at   | 0.00806  | 0.5  | --- | ---                                                                                                         |
| 229220_x_at | 0.0027   | 0.4  | --- | Homo sapiens, clone IMAGE:4151011, mRNA                                                                     |
| 229373_at   | 0.00393  | 2.3  | --- | Transcribed locus                                                                                           |
| 229498_at   | 0.00183  | 3.1  | --- | MRNA; cDNA DKFZp779M2422 (from clone DKFZp779M2422)                                                         |
| 229832_x_at | 4.82E-05 | 2.6  | --- | ---                                                                                                         |
| 230208_at   | 0.000528 | 2.1  | --- | Transcribed locus                                                                                           |
| 230739_at   | 0.00183  | 0.7  | --- | CAMP-binding guanine nucleotide exchange factor IV (cAMP-GEFIV) mRNA, clone W15, partial sequence           |
| 231039_at   | 0.0027   | 0.6  | --- | Transcribed locus                                                                                           |
| 231225_at   | 0.00564  | 0.6  | --- | Transcribed locus, weakly similar to XP_512872.1 similar to Zinc finger protein 83 (HPF1) [Pan troglodytes] |
| 231274_s_at | 8.96E-06 | 15.7 | --- | ---                                                                                                         |
| 231688_at   | 0.00806  | 30.3 | --- | Transcribed locus                                                                                           |
| 233068_at   | 0.000528 | 0.6  | --- | CDNA FLJ13202 fis, clone NT2RP3004503                                                                       |
| 234969_s_at | 8.96E-06 | 0.6  | --- | ---                                                                                                         |
| 234973_at   | 0.000214 | 2.5  | --- | ---                                                                                                         |
| 235014_at   | 0.00081  | 0.6  | --- | ---                                                                                                         |
| 235124_at   | 0.00393  | 0.7  | --- | CDNA FLJ35228 fis, clone PROST2001283                                                                       |
| 235199_at   | 0.00566  | 0.6  | --- | Transcribed locus, weakly similar to XP_513408.1                                                            |
| 235466_s_at | 0.00806  | 0.5  | --- | Transcribed locus                                                                                           |
| 236081_at   | 1.30E-06 | 18.0 | --- | Transcribed locus                                                                                           |
| 236196_at   | 0.00806  | 0.7  | --- | CDNA FLJ42548 fis, clone BRACE3004996                                                                       |
| 236198_at   | 4.86E-06 | 0.4  | --- | Transcribed locus                                                                                           |
| 236280_at   | 0.00123  | 0.5  | --- | Transcribed locus                                                                                           |
| 236301_at   | 0.00123  | 0.5  | --- | Full length insert cDNA clone YY82H04                                                                       |
| 237299_at   | 0.000214 | 3.3  | --- | Transcribed locus, moderately similar to NP_055301.1 neuronal thread protein AD7c-NTP [Homo sapiens]        |
| 238431_at   | 0.000339 | 0.6  | --- | Transcribed locus, weakly similar to NP_055301.1 neuronal thread protein AD7c-NTP [Homo sapiens]            |
| 239278_at   | 0.000214 | 0.6  | --- | Homo sapiens, clone IMAGE:5301129, mRNA                                                                     |
| 241143_at   | 0.00806  | 1.5  | --- | ---                                                                                                         |
| 242104_at   | 0.00806  | 0.5  | --- | CDNA FLJ46553 fis, clone THYMU3038879                                                                       |
| 242335_at   | 1.30E-06 | 6.4  | --- | FP15737                                                                                                     |
| 242841_at   | 0.00325  | 1.7  | --- | Full length insert cDNA clone YS02G11                                                                       |
| 243024_at   | 0.00393  | 1.5  | --- | ---                                                                                                         |
| 244008_at   | 2.82E-05 | 0.7  | --- | Transcribed locus                                                                                           |
| 244189_at   | 4.79E-05 | 0.5  | --- | ---                                                                                                         |
| 36553_at    | 1.30E-06 | 0.4  | --- | ---                                                                                                         |
| 65472_at    | 0.00393  | 0.5  | --- | Hypothetical LOC388969                                                                                      |

List of 873 genes distinguishing SOJIA patients from healthy volunteers ( $P < 0.01$ , Wilcoxon-Mann-Whitney test, Bonferroni correction). Genes are grouped based on gene ontology.

\*, 50 most significant genes.
